# Supplementary material for: Loss of CITED1, an MITF regulator, drives a phenotype switch in vitro and can predict clinical outcome in primary melanoma tumours
Source: PeerJ. 2015 Feb 26;3:e788. doi: 10.7717/peerj.788 (PMC4349148; doi:10.7717/peerj.788)
Supplement: Data S1 [file peerj-03-788-s009.xlsx]

## Sheet: 2006 motif1 prolif (51)
Gene Symbols	flag	updated gene symbol
AP1S2
APOC1	*	match not found
APOE
BCL2A1
CAPN3
CART1	*	ALX1
CDK5R1
CITED1
CLCN7
D4S234E
DCT
APOLD1
DSU	*	MREG
EDNRB
ERBB3
GALNT3
GK
GMPR
GPM6B
GPR143
GPR56
GPRC5B
GREB1
GYG2
INPP4B
IRF4
ITPKB
LZTS1
MATP	*	SLC45A2
MBP
MITF
MLANA
PHACTR1
PIR
PLA1A
PLP1
PLXNC1
RAB38
RENBP
RGS20
RRAGD
S100A1
SILV
SNCA
SOX10
ST3GAL6
TFAP2A
TNFRSF14
TRPM1
TYR
TYRP1

## Sheet: 2006 motif2 invas (54)
Gene Symbols	flag	updated gene symbol
ABCC3
ADAM12
AMIGO2
ARK5	*	NUAK1
AXL
BGN
CDH13
CDH2
COL5A1
CTGF
CXCL2
CYR61
DKK1
DKK3
EGFR
EHD2
ELL2
F3
FBN1
FGF2
FOXD1
HNT
HS3ST3A1
IL6
IL8
INHBA
KIAA1199
LCRISP2	*	CRISPLD2
LOX
LOXL2
MICAL2
NID2
NNMT
NRP1
PDGFC
PDGFRB
PLAGL1
PODXL
PTGFR
PTX3
SART2	*	DSE
SERPINE1
STC2
TAGLN
TCF4
TGFBI
THBS1
THY1
TNFRSF11B
TPM1
TPM2
VEGFC
WNT5A
WNT5B

## Sheet: 2012 prolif
Gene Symbols	flag	updated gene symbol
ACP5
ADCY2
APOE
APOE
ASAH1
ASAH1
ASAH1
BIRC7
C21orf91
CAPN3
CAPN3
CDH1
CDK2
CDK2
CDK5R1
CEACAM1
DAPK1
DCT
DCT
DCT
DCT
FAM174B	*	not found
GALNT3
GNPTAB
GPM6B
GPM6B
GPM6B
GPM6B
GPR143
GPRC5B
GYG2
HPS4
HPS4
INPP4B
IRF4
IVNS1ABP
KAZ	*	not found
MBP
MBP
MICAL1
MITF
MLANA
MLANA
MYO1D
NR4A3
NR4A3
OCA2
PHACTR1
PIR
PLXNC1
PLXNC1
PLXNC1
PMEL	*	SILV
RAB27A
RAB38
RGS20
RHOQ
RHOQ
RRAGD
RRAGD
SEMA6A
SIRPA
SIRPA
SLC45A2
SLC45A2
ST3GAL6
STX7
TNFRSF14
TRPM1
TYR
TYRP1
WDR91
ZFYVE16

## Sheet: 2012 invas
Gene Symbols	flag	updated gene symbol
ADAM12
AMOTL2
AXL
BIRC3
CDH13
CDK14	*	PFTK1
COL13A1
CRIM1
CRIM1
CRISPLD2
CYR61
CYR61
DPYD
EFEMP1
EGFR
F2RL1
FGF2
FLNB
FOXD1
FST
FZD2
HEG1
HEG1
HS3ST3A1
ITGA2
ITGA3
KCNMA1
KCNMA1
LOXL2
MYOF
NRP1
NRP1
NTM	*	HNT
NUAK1
OSMR
PDGFC
PODXL
S100A2
SLC22A4
SLIT2
SYNJ2
TCF4
TCF4
TCF4
THBS1
THBS1
TLE4
TLE4
TNFRSF11B
TPBG
TPM1
TPM1
TPM1
TRAM2
WNT5A
WNT5A
ZEB1
ZEB1
ZEB1

## Sheet: references
Sources of the genes lists provided
Hoek, K.S. et al., 2006. Metastatic potential of melanomas defined by specific gene expression profiles with no BRAF signature. Pigment cell research / sponsored by the European Society for Pigment Cell Research and the International Pigment Cell Society, 19(4), pp.290–302.
Hoek, K.S., 105 Genes with melanoma cell phenotype-specific expression. dermatologie.usz.ch. Available at: http://www.dermatologie.usz.ch/Research/Groups/hoek/information/Seiten/work_105.aspx [Accessed November 26, 2014].
Widmer, D.S. et al., 2012. Systematic classification of melanoma cells by phenotype-specific gene expression mapping. Pigment Cell & Melanoma Research, 25(3), pp.343–353.
