# Supplementary material for: Loss of CITED1, an MITF regulator, drives a phenotype switch in vitro and can predict clinical outcome in primary melanoma tumours
Source: PeerJ. 2015 Feb 26;3:e788. doi: 10.7717/peerj.788 (PMC4349148; doi:10.7717/peerj.788)
Supplement: File S2 [file peerj-03-788-s008.xlsx]

## Sheet: 312 SAM fdr=10.txt
id	externalId	symbol	Species	UniGene ID	Length	Sequence	Vector	Tissue	Library	Accession	NID	Chromosome	Cytoband	Markers	Antibiotics	LocusLink	OMIM	Start position	End position	Ensembl Gene	Ensembl transcript	Ensembl protein family	Swissprot	RefSeq	Transcript count	Original accession	DB version	GO biological process	GO molecular function	GO cell location	Cross hybridization	Polymorphism	GC content	Source	Search key	ILMN Gene	Source reference id	Isoform type	Probe chr orientation	Probe coordinates	Synonyms	Control group name	Control group id	Control composite map	Ilmn strand	SNP	experimentalFactor	TX_END	CHR_LOCATION
36765	ILMN_1685703	ACOX2	Homo sapiens			CGCCTGTTCCAGTGGGCTCAGAAGTCACCAACCAATACTCAGGAGAACCC				NM_003500.2		3				8309																		RefSeq	ILMN_27517	ACOX2	NM_003500.2	S	-	58466045-58466053:58469660-58469700	BRCOX; THCCox; BCOX; BRCACOX							-1	chrna:
41368	ILMN_2078599	ACP5	Homo sapiens			CCGGGACCCTGCTCACAGGCAGGCTTTTCCTCCAACCTGTGGCGCTGCAG				NM_001611.2		19				54																		RefSeq	ILMN_20083	ACP5	NM_001611.2	S	-	11546718-11546767	TRAP; MGC117378							-1	chrna:
12398	ILMN_1671703	ACTA2	Homo sapiens			CACTTTCCTGCTCCTCTCTGTCTCTAGCACACAACTGTGAATGTCCTGTG				NM_001613.1		10				59																		RefSeq	ILMN_6588	ACTA2	NM_001613.1	S	-	90684907-90684956	ACTSA							-1	chrna:
31460	ILMN_1803686	ADA	Homo sapiens			CAGGGCAGAACCTCTGAAGACGCCACTCCTCCAAGCCTTCACCCTGTGGA				NM_000022.2		20				100																		RefSeq	ILMN_8067	ADA	NM_000022.2	S	-	42681855-42681888:42681889-42681902:42682354-42682355								-1	chrna:
1986	ILMN_1673566	ADAMTS1	Homo sapiens			GCCGGAACAAAAATGAGGTGTGTAGAACAGGGTCCCACAGGTTTGGGGAC				NM_006988.3		21				9510																		RefSeq	ILMN_11081	ADAMTS1	NM_006988.3	S	-	27130839-27130888	KIAA1346; C3-C5; METH1							-1	chrna:
41556	ILMN_1681886	ADAMTS5	Homo sapiens			CACTCAGGCACAACGTAAACCTTGATGGCTCATCTTGCTACAATTACGAG				NM_007038.2		21				11096																		RefSeq	ILMN_22081	ADAMTS5	NM_007038.2	S	-	27212742-27212791	ADAMTS11; ADMP-2; FLJ36738							-1	chrna:
786	ILMN_1679797	ADARB1	Homo sapiens			TACACCACACGTTACAACTGCATGAGCTTCCTCTCGCACAAGACCAGCTG				NM_001112.2		21				104																		RefSeq	ILMN_4112	ADARB1	NM_001112.2	A	+	45470779-45470828	ADAR2a; ADAR2; DRABA2; DRADA2; ADAR2a-L1; ADAR2a-L2; ADAR2g; RED1; ADAR2a-L3; ADAR2b; ADAR2d							-1	chrna:
29514	ILMN_2120555	ADCY1	Homo sapiens			GCGCCTGCGTTCTTCTGGGTTTGGCTAGATAGGGTTGTGTCCCTCTATGG				NM_021116.1		7				107																		RefSeq	ILMN_179982	ADCY1	NM_021116.1	S	+	45728797-45728846								-1	chrna:
34632	ILMN_2162799	AHR	Homo sapiens			CAGACTACCACACATCTTCAGCCACTTCATCATCCGTCAGAAGCCAGACC				NM_001621.3		7				196																		RefSeq	ILMN_174431	AHR	NM_001621.3	S	+	17349130-17349179								-1	chrna:
16989	ILMN_1681301	AIM2	Homo sapiens			GCTGGTGAAACCCCGAAGATCAACACGCTTCAAACTCAGCCCCTTGGAAC				NM_004833.1		1				9447																		RefSeq	ILMN_10231	AIM2	NM_004833.1	S	-	157302354-157302403	PYHIN4							-1	chrna:
19884	ILMN_1713124	AKR1C3	Homo sapiens			GCCGGTGACTGGACATATCACCTCTACTTAAATCCGTCCTGTTTAGCGAC				NM_003739.4		10				8644																		RefSeq	ILMN_11871	AKR1C3	NM_003739.4	S	+	5139765-5139814	HAKRB; hluPGFS; DD3; HSD17B5; HAKRe; KIAA0119; HA1753							-1	chrna:
30958	ILMN_2096372	ALDH1A1	Homo sapiens			AGCTTCTTCTGAAAGAATTATTTGCCTTCTGAAATGTGACCCCCAAGTCC				NM_000689.3		9				216																		RefSeq	ILMN_177898	ALDH1A1	NM_000689.3	S	-	74705733-74705782	ALDH11; ALDH-E1; ALDC; RALDH1; MGC2318; ALDH1; PUMB1							-1	chrna:
38032	ILMN_1707727	ANGPTL4	Homo sapiens			GGGACACAAGCAGGCGCCAATGGTATCTGGGCGGAGCTCACAGAGTTCTT				NM_139314.1		19				51129																		RefSeq	ILMN_20440	ANGPTL4	NM_139314.1	A	+	8345182-8345231	HFARP; ANGPTL2; PGAR; NL2; pp1158; PPARG; ARP4; FIAF							-1	chrna:
32179	ILMN_1755937	ANXA2	Homo sapiens			CGTGCTTGGGGTTCAGCTGGTGAGGCTGTCCCTGTAGGAAGAAAGCTCTG				NM_001002857.1		15				302																		RefSeq	ILMN_8830	ANXA2	NM_001002857.1	A	-	58426725-58426774	P36; LPC2D; ANX2L4; ANX2; PAP-IV; CAL1H; LIP2; LPC2							-1	chrna:
5921	ILMN_1711408	ANXA4	Homo sapiens			CCGGTCAGTAAGAATGCCCATCCAGTTTTCTATATTTCATAGTCAAAGCC				NM_001153.2		2				307																		RefSeq	ILMN_23425	ANXA4	NM_001153.2	S	+	69906609-69906658	DKFZp686H02120; MGC75105; PIG28; ANX4							-1	chrna:
27750	ILMN_1788192	ARMCX1	Homo sapiens			CATGGTCTGTCGCTTGGACTCAGCTGTGCAGATGGCTGGGCTAAGACTGT				NM_016608.1		X				51309																		RefSeq	ILMN_9172	ARMCX1	NM_016608.1	S	+	100695454-100695503	DKFZp686P06199; ALEX1							-1	chrna:
15755	ILMN_2223720	ASCIZ	Homo sapiens			ATGAGCATGTAATAATACAAGAACTGTTTCCCCCTCAAAACCTGAACCTG				NM_015251.2		16				23300																		RefSeq	ILMN_162053	ASCIZ	NM_015251.2	S	+	79638243-79638292	DKFZp779K1455; KIAA0431							-1	chrna:
47066	ILMN_2124155	ATP11B	Homo sapiens			GGACCTGAGACACTGTGGCTGTCTAATGTAATCCTTTAAAAATTCTCTGC				NM_014616.1		3				23200																		RefSeq	ILMN_181963	ATP11B	NM_014616.1	S	+	184121968-184122017	DKFZP434N1615; KIAA0956; ATPIR; DKFZP434J238; ATPIF; MGC46576							-1	chrna:
43569	ILMN_1654322	ATP1B3	Homo sapiens			GAGTGGAAGCTCTTCATCTACAACCCGACCACCGGAGAATTCCTGGGGCG				NM_001679.2		3				483																		RefSeq	ILMN_3785	ATP1B3	NM_001679.2	I	+	143078376-143078425	ATPB-3; CD298; FLJ29027							-1	chrna:
45282	ILMN_2341363	ATP5A1	Homo sapiens			TATCGTGAGGTTGCTGCTTTTGCCCAGTTCGGTTCTGACCTCGATGCTGC				NM_004046.4		18				498																		RefSeq	ILMN_6253	ATP5A1	NM_004046.4	A	-	41920138-41920187	ORM; ATP5A; ATPM; OMR; hATP1; ATP5AL2							-1	chrna:
36776	ILMN_1782057	ATP8B2	Homo sapiens			GGAATGGGAGAGGGGAAGTCTTGGCAGGGAAATCCCTTTTGGCCACACAG				NM_020452.2		1				57198																		RefSeq	ILMN_19940	ATP8B2	NM_020452.2	I	+	152590047-152590096	KIAA1137; ATPID; DKFZp434M0219							-1	chrna:
21243	ILMN_2089073	ATP9A	Homo sapiens			CTGAGCGACTCTACTTTCATTGTTTGCCAGCGTGGCTCGTTGCTGTTGCC				NM_006045.1		20				10079																		RefSeq	ILMN_176431	ATP9A	NM_006045.1	S	-	49646744-49646793	KIAA0611; ATPIIA							-1	chrna:
15766	ILMN_1685824	B4GALT5	Homo sapiens			CCTCTTGTCAGAGATCCTCTACCACAGACATTAATAGCTGAGCAGGAGCC				NM_004776.2		20				9334																		RefSeq	ILMN_5773	B4GALT5	NM_004776.2	S	-	47683153-47683202	beta4Gal-T5; BETA4-GALT-IV; B4Gal-T5; gt-V; beta4GalT-V							-1	chrna:
44007	ILMN_1710514	BCL3	Homo sapiens			CTGTCCGGAATGCCACCCACATCTTCCATTTCCATGTCCCCTCCCAGAGC				NM_005178.2		19				602																		RefSeq	ILMN_17874	BCL3	NM_005178.2	S	+	49954947-49954996	D19S37; BCL4							-1	chrna:
36586	ILMN_1675612	BLCAP	Homo sapiens			AGTGTTGGCAAACGAGACTTTCTCCTGGCCCCTGCCTGCTGGAGATCAGC				NM_006698.2		20				10904																		RefSeq	ILMN_16211	BLCAP	NM_006698.2	S	-	35579446-35579495	BC10							-1	chrna:
8301	ILMN_1724658	BNIP3	Homo sapiens			CACCCTGGATGATCAGTTTTCTGCTGAAGGCACCTACTCAGTATCTTTTC				NM_004052.2		10				664																		RefSeq	ILMN_3871	BNIP3	NM_004052.2	S	-	133631327-133631376	NIP3							-1	chrna:
38744	ILMN_2311089	BRCA1	Homo sapiens			TCCAGGACTGTTTATAGCTGTTGGAAGGACTAGGTCTTCCCTAGCCCCCC				NM_007304.2		17				672																		RefSeq	ILMN_27536	BRCA1	NM_007304.2	A	-	38449934-38449983	RNF53; BRCAI; PSCP; BRCC1; IRIS							-1	chrna:
22536	ILMN_2226324	BRP44L	Homo sapiens			GACCACAAGACAACCAACAGCTGGCCACGTACTTAAAATTTTGTCCCCAC				NM_016098.1		6				51660																		RefSeq	ILMN_4349	BRP44L	NM_016098.1	S	-	166698487-166698536	CGI-129; dJ68L15.3							-1	chrna:
8126	ILMN_1689237	BVES	Homo sapiens			TCACTGCTTCGGTTCTGCTCATCAGGGGACACGCTCCCTTACTCATGGCA				NM_147147.2		6				11149																		RefSeq	ILMN_25037	BVES	NM_147147.2	A	-	105651709-105651758	POPDC1; POP1; HBVES; MGC42413							-1	chrna:
23105	ILMN_1680367	C10orf90	Homo sapiens			GCTGTGGAACAATCAGCCCATCTCTTTGTGACCTGGAGCAGTCAGAGGGC				NM_001004298.2		10				118611																		RefSeq	ILMN_21345	C10ORF90	NM_001004298.2	S	-	128103828-128103877	RP11-422P15.2; bA422P15.2; FLJ32938							-1	chrna:
24197	ILMN_1692826	C16orf28	Homo sapiens			TCTGTGCGCCTGCGCCTCGGAGAGCAAGTGAAGGAGCATCATGGGTTTTG				NM_023076.3						65259																		RefSeq	ILMN_23459	C16ORF28	NM_023076.3	S			FLJ23360							-1	chrna:
27818	ILMN_2194828	C16orf53	Homo sapiens			ACCTCAAGCTCCCAAACAGCACGTTGCGGGAAAGAGGAAGAGAGAGTGTG				NM_024516.2		16				79447																		RefSeq	ILMN_20272	C16ORF53	NM_024516.2	S	+	29738678-29738727	PA1; MGC4606							-1	chrna:
22105	ILMN_1690442	C18orf45	Homo sapiens			CCCCAGAGGAAACAGGGTTTATGAGCACTGACAGATGTCTTCCCTGGGCA				NM_032933.4						85019																		RefSeq	ILMN_7824	C18ORF45	NM_032933.4	S			MGC138577; MGC11386; FLJ44259							-1	chrna:
3939	ILMN_1798728	C19orf2	Homo sapiens			GGTTTTGCGGCTAGTTGGCTATTCAAGAAACCTCGCCCCTCTGAATGTCA				NM_134447.1		19				8725																		RefSeq	ILMN_5049	C19ORF2	NM_134447.1	A	+	35198282-35198331	FLJ10575; RMP; NNX3; URI							-1	chrna:
20724	ILMN_1668540	C1orf181	Homo sapiens			CTGTGCCTTTCATCACATTCCTAGCCCACTCTCATCATTACTGCAGAAGG				NM_017953.2		1				54680																		RefSeq	ILMN_20839	C1ORF181	NM_017953.2	S	-	85891339-85891388	NY-BR-75; FLJ20729; MGC131963; FLJ20760							-1	chrna:
8821	ILMN_1734486	C1orf19	Homo sapiens			GTGGTGCCATAGTTTGTCATCCCTGGGTCTAGGAAATAGTCAATAAACAG				NM_052965.1		1				116461																		RefSeq	ILMN_16022	C1ORF19	NM_052965.1	S	+	182309649-182309698	sen15							-1	chrna:
9281	ILMN_1698243	C1orf85	Homo sapiens			GGGACAGGGCTATTGATAAGGTCCCCTTGGTGTTGCCTTCTTGCATCTCC				NM_144580.1		1				112770																		RefSeq	ILMN_23607	C1ORF85	NM_144580.1	S	-	154529204-154529253	NCU-G1; MGC31963; RP11-443G18.2							-1	chrna:
42038	ILMN_2380237	C1QTNF1	Homo sapiens			CCCTAAGTCCCTCTCTTTAAAGAACTTCTGCGGGTCAGACTCTGAAGCCG				NM_198594.1		17				114897																		RefSeq	ILMN_17571	C1QTNF1	NM_198594.1	A	+	74557316-74557365	CTRP1; ZSIG37; GIP; FLJ90694							-1	chrna:
4070	ILMN_1708016	C20orf108	Homo sapiens			GGGCTTAAATCTCAAACTTTGTTAGGAGTAACAGGAGCGTGCTGAGCGGG				NM_080821.2		20				116151																		RefSeq	ILMN_25852	C20ORF108	NM_080821.2	S	+	54376846-54376895	DKFZP434A1114; dJ1167H4.1; 5A3							-1	chrna:
35839	ILMN_1755909	C20orf11	Homo sapiens			GTGCCCCTCTGTATCTTTTGAGAAGTGCGGAATAGGTTGCTTCTACCACC				NM_017896.2		20				54994																		RefSeq	ILMN_27220	C20ORF11	NM_017896.2	S	+	61050180-61050229	TWA1							-1	chrna:
32325	ILMN_1695959	C21orf63	Homo sapiens			CAGTTCCATAGAAGCTGCAGAGCTCGCAGAAAGGATTGAGCGCAGGGAGC				NM_058187.3		21				59271																		RefSeq	ILMN_23238	C21ORF63	NM_058187.3	S	+	32809248-32809297	PRED34; B19; SUE21; B18; C21orf64							-1	chrna:
11601	ILMN_1795838	C4orf19	Homo sapiens			TAAGCTCAGCAGTTTTCACAGTAGAGCAGAAGTCCCCAGGAAACAAAGGG				NM_018302.1		4				55286																		RefSeq	ILMN_18472	C4ORF19	NM_018302.1	S	+	37269572-37269621	FLJ11017							-1	chrna:
1480	ILMN_2225577	C5orf37	Homo sapiens			CCCCGGACCATTCATCCTGAAAGTAGTACCTCAGCTTCCAGATCACTTGG				NM_152408.1		5				134359																		RefSeq	ILMN_6243	C5ORF37	NM_152408.1	S	-	75006076-75006125	MGC120443; FLJ35779; MGC120442; MGC120444							-1	chrna:
33180	ILMN_1705116	C6orf85	Homo sapiens			GTCCTCTCGTCTAGAAGGCACCACCTCGCTTTCATGTCCCGTGTGTTTTG				NM_021945.4		6				63027																		RefSeq	ILMN_491	C6ORF85	NM_021945.4	S	-	3214941-3214990	DKFZP434F011; FLJ22174							-1	chrna:
1059	ILMN_1702197	C9orf140	Homo sapiens			AGCGTCCCTGGGCTCTATCCGCGAGGTGCCAGTAGCGTGTGCAGGTACAT				NM_178448.2		9				89958																		RefSeq	ILMN_24887	C9ORF140	NM_178448.2	S	-	139076854-139076903								-1	chrna:
24879	ILMN_1761138	C9orf142	Homo sapiens			CAGCTGGTGGCGTGGACTTCGATGAGACCTGAAGGTGCAGCACAAGCGTG				NM_183241.1		9				286257																		RefSeq	ILMN_17952	C9ORF142	NM_183241.1	S	+	139008047-139008078:139008079-139008096								-1	chrna:
11242	ILMN_1727194	CALU	Homo sapiens			GAACTGTGTGGCAAGAGAGCCTCACACCTCACTAGGTGCAGAGAGCCCAG				NM_001219.2		7				813																		RefSeq	ILMN_24697	CALU	NM_001219.2	S	+	128198425-128198474	FLJ90608							-1	chrna:
153	ILMN_2332691	CAPN3	Homo sapiens			CCCCTACCCATCCTTGATCGGTCATGCCTAGCCTGACCCTTTAGTAAAGC				NM_173087.1		15				825																		RefSeq	ILMN_8100	CAPN3	NM_173087.1	A	+	40491414-40491463	CANP3; MGC14344; p94; LGMD2; MGC10767; CANPL3; MGC11121; MGC4403; LGMD2A; nCL-1							-1	chrna:
1107	ILMN_1687971	CAPN3	Homo sapiens			CAAACCCTTGTCCCTTTGCCATGTGGAGGAAAGTGCCTGCCTCTGGTCCG				NM_024344.1		15				825																		RefSeq	ILMN_1628	CAPN3	NM_024344.1	A	+	40491480-40491529	CANP3; MGC14344; p94; LGMD2; MGC10767; CANPL3; MGC11121; MGC4403; LGMD2A; nCL-1							-1	chrna:
21329	ILMN_2192281	CARD8	Homo sapiens			CTATCCTGTGTGTGCCTATGAGATTGGGTGCAGTGTATCCTGTTAGCTCC				NM_014959.1		19				22900																		RefSeq	ILMN_13144	CARD8	NM_014959.1	S	-	53403423-53403472	NDPP1; CARDINAL; TUCAN; KIAA0955; MGC57162; DKFZp779L0366; DACAR							-1	chrna:
8486	ILMN_1680134	CARM1	Homo sapiens			GGCCTGAGTAGCTCCCCTCCATCCTTGTAGACGCTCCAGTCCCTACTACT				NM_199141.1		19				10498																		RefSeq	ILMN_5570	CARM1	NM_199141.1	S	+	10894286-10894335	PRMT4							-1	chrna:
3959	ILMN_1789394	CATSPER1	Homo sapiens			CAGGAATTGACCCCAGGAGGACACCAGATACAGACTTCAGCCCCTGGCAG				NM_053054.2		11				117144																		RefSeq	ILMN_5805	CATSPER1	NM_053054.2	S	-	65540896-65540936:65540937-65540945	CATSPER; MGC33368; MGC33335							-1	chrna:
288	ILMN_2347349	CCNB1IP1	Homo sapiens			TTGAGCCACGCATAGTGTCACGCACCTGTGATCCCAGCTACTTAGGAGGT				NM_182851.1		14				57820																		RefSeq	ILMN_173981	CCNB1IP1	NM_182851.1	A	-	19849502-19849548:19849549-19849551	C14orf18; HEI10							-1	chrna:
20631	ILMN_1718565	CDKN1C	Homo sapiens			AAGAGGCTGCGGTGAGCCAATTTAGAGCCCAAAGAGCCCCGAGGGAACCT				NM_000076.1		11				1028																		RefSeq	ILMN_20689	CDKN1C	NM_000076.1	S	-	2861687-2861721:2861805-2861809:2861810-2861819	BWCR; p57; BWS; KIP2; WBS							-1	chrna:
9614	ILMN_1666305	CDKN3	Homo sapiens			CGCAGATGGAGGGACTCCTGACATAGCCAGCTGCTGTGAAATAATGGAAG				NM_005192.2		14				1033																		RefSeq	ILMN_4098	CDKN3	NM_005192.2	S	+	53948082-53948131	CDI1; KAP; MGC70625; FLJ25787; CIP2; KAP1							-1	chrna:
32604	ILMN_3265365	CEP78	Homo sapiens			GCAACACCCTGGAAAGGACCTGCATTCCTGATCTGACTGTCCTGAAAACC				NM_032171.1		9				84131																		RefSeq	NM_032171.1	CEP78	NM_032171.1	M	+	80071468-80071498:80071499-80071517	C9orf81; IP63; MGC135040; FLJ12643							-1	chrna:
21659	ILMN_2106902	CHES1	Homo sapiens			AGAAACAGTGTGGAGGCAGGCGCGATCAGCCGAACTCTAGGGACTTGGTG				NM_005197.2		14				1112																		RefSeq	ILMN_182611	CHES1	NM_005197.2	S	-	88692454-88692503	C14orf116; FOXN3; PRO1635							-1	chrna:
1017	ILMN_1653828	CHFR	Homo sapiens			TGAGGGGCACCTTGGCTTCCGCCTGTGCTAGCTTTGCCATGTCATCTGGA				NM_018223.1		12				55743																		RefSeq	ILMN_26892	CHFR	NM_018223.1	S	-	131927233-131927282	RNF196; FLJ10796; FLJ33629; RNF116							-1	chrna:
19442	ILMN_1773363	CIITA	Homo sapiens			GGGTTTGAGTTCATACCCTGTTACCATTTTGGGGTACCCACTGCTCTGGT				NM_000246.2		16				4261																		RefSeq	ILMN_22738	CIITA	NM_000246.2	S	+	10926233-10926282	CIITA IV; MHC2TA; NLRA; C2TA							-1	chrna:
41190	ILMN_1674661	CIRBP	Homo sapiens			AACGGACTGTGAATCCGCTCTTTGTCGGAAGCTGAGCAAGCTGTGGCTTT				NM_001280.1		19				1153																		RefSeq	ILMN_24327	CIRBP	NM_001280.1	S	+	1223846-1223895	CIRP							-1	chrna:
23023	ILMN_1691641	CITED1	Homo sapiens			GCTCCCACTAGTTCCTCGGGATCTCCAATAGGCTCTCCTACAACCACCCC				NM_004143.2		X				4435																		RefSeq	ILMN_9231	CITED1	NM_004143.2	S	-	71438652-71438701	MSG1							-1	chrna:
14634	ILMN_1789733	CLIP3	Homo sapiens			CAGCTCACGACTGCCCCTTCACTGCATGTCCCCAAACTCAGCATGACTCC				NM_015526.1		19				25999																		RefSeq	ILMN_26693	CLIP3	NM_015526.1	S	-	41197432-41197481	RSNL1; CLIPR-59; CLIPR59; FLJ33413; DKFZp586N1922							-1	chrna:
3039	ILMN_1705442	CMTM3	Homo sapiens			GCAGGTCTATGGGCCACTGCAGGAGATGAGACCAGCCTTCTGTGTTCACC				NM_144601.2		16				123920																		RefSeq	ILMN_15078	CMTM3	NM_144601.2	A	+	65204882-65204931	BNAS2; MGC51956; CKLFSF3; FLJ31762							-1	chrna:
32706	ILMN_2370208	CMTM3	Homo sapiens			GGTGCTCCTGCCCACACCAGCCACTTTGGTGACAATGACCCTTCCAAGAA				NM_001048251.1						123920																		RefSeq	ILMN_174690	CMTM3	NM_001048251.1	A			BNAS2; MGC51956; CKLFSF3; FLJ31762							-1	chrna:
20846	ILMN_1698733	CNIH2	Homo sapiens			AGGCTCTTTCTCCAGCCCTGTCTCCATCTGCCCCAACCTCAGCCCACCTT				NM_182553.1		11				254263																		RefSeq	ILMN_138076	CNIH2	NM_182553.1	A	+	65808112-65808161	MGC50896; Cnil							-1	chrna:
20067	ILMN_1809496	COPG2	Homo sapiens			GGCCCTGAGCCAGCAGATCAAGCAAATGTCTATCTTTGCGCATGGGTTGT				NM_012133.2		7				26958																		RefSeq	ILMN_23766	COPG2	NM_012133.2	S	-	129933576-129933625	FLJ11781; 2-COP							-1	chrna:
13020	ILMN_1751097	CREB3L2	Homo sapiens			AACCAGGGGTTTTAGCTCTGTTCTCTGCTCCCATCCTTCGCTCACCAGCT				NM_194071.2		7				64764																		RefSeq	ILMN_12716	CREB3L2	NM_194071.2	S	-	137210715-137210764	BBF2H7; MGC131709; MGC71006							-1	chrna:
13230	ILMN_1803302	CRK	Homo sapiens			CCTAACTAATGGGATCCAGCAGGGCCATTTCTCCAGAGGGCCAGTATCCT				NM_016823.2		17				1398																		RefSeq	ILMN_25875	CRK	NM_016823.2	A	-	1272688-1272737	CRKII							-1	chrna:
6388	ILMN_1714397	CRYL1	Homo sapiens			CCTGAGTGGGGTGGTGCAGGCCGGTAGTCTGCCCGTCACTTTGGATCATA				NM_015974.2						51084																		RefSeq	ILMN_17181	CRYL1	NM_015974.2	S			MGC149526; MGC149525; GDH; lambda-CRY							-1	chrna:
1229	ILMN_1807719	CTNS	Homo sapiens			GGGGGTCCCAGGACGTGCCTCATACATGACTTGAGCTTGTCAGTCCACTG				NM_004937.2						1497																		RefSeq	ILMN_11769	CTNS	NM_004937.2	A			PQLC4; CTNS-LSB							-1	chrna:
25163	ILMN_1769633	CTSO	Homo sapiens			CGCCAGTCAGAACCAATCCGAAAAGAATGTGTGTTGACTCAGGTTTGGAG				NM_001334.2		4				1519																		RefSeq	ILMN_22132	CTSO	NM_001334.2	S	-	157064975-157065024	CTSO1							-1	chrna:
42156	ILMN_1811121	CXorf39	Homo sapiens			GTGGATAGCATTTTGAAGGTGACCGTGATTCTGTAGGAAGAGCTGTAATC				NM_207318.1		X				139231																		RefSeq	ILMN_18853	CXORF39	NM_207318.1	S	+	103322413-103322462								-1	chrna:
7463	ILMN_3256325	CYB561D1	Homo sapiens			GAGCAGGGAGGCTTCTGGTAGTGCTCTTGATGCTCCTGTGTCTGGTTGGC				NM_182580.2		1				284613																		RefSeq	NM_182580.2	CYB561D1	NM_182580.2	M	+	110042791-110042840								-1	chrna:
2033	ILMN_1696254	CYB5D2	Homo sapiens			TCCCTTTGACCTACTGGCCATCTTCCTCACAGCCCTCAGATATCAACGGG				NM_144611.2		17				124936																		RefSeq	ILMN_26268	CYB5D2	NM_144611.2	S	+	4007353-4007402	MGC32124							-1	chrna:
14913	ILMN_1730612	DBNDD2	Homo sapiens			AGGTGGTACTCAAGCCATGCTGCCTCCTTACATCCTTTTTGGAACAGAGC				NM_001048223.1						55861																		RefSeq	ILMN_16665	DBNDD2	NM_001048223.1	I			HSMNP1; CK1BP; C20orf35							-1	chrna:
46671	ILMN_1738866	DEXI	Homo sapiens			CGCTCCTTCATTTCAGGTTACTCGTTCTTCAGCAAGTTGGCAAAACAGAC				NM_014015.3		16				28955																		RefSeq	ILMN_4010	DEXI	NM_014015.3	S	-	10930398-10930447	MYLE							-1	chrna:
10659	ILMN_1751785	DMRT2	Homo sapiens			CTTAAGAGGCCTTCATCTGCCATCACTCGTGTCTCTCAGTGAAAGGCTGC				NM_006557.4						10655																		RefSeq	ILMN_8673	DMRT2	NM_006557.4	A										-1	chrna:
15221	ILMN_2328977	DNMT3B	Homo sapiens			TGTAACTGGAGCCACGACGTAACAAATATGGGGAAAAAACTGTGCCTTGT				NM_006892.3		20				1789																		RefSeq	ILMN_182605	DNMT3B	NM_006892.3	A	+	30860688-30860737	ICF; M.HsaIIIB							-1	chrna:
10860	ILMN_2112301	DRAP1	Homo sapiens			GGACGAAGAAGATTACGACTCCTAGCGCCTTCTGCCCCCCAGACCATAGC				NM_006442.2		11				10589																		RefSeq	ILMN_9412	DRAP1	NM_006442.2	S	+	65445458-65445482:65445483-65445507	NC2-alpha							-1	chrna:
45078	ILMN_1781285	DUSP1	Homo sapiens			GCAGAAGAGAAAGGACTCAGTGTGTGATCCGGTTTCTTTTTGCTCGCCCC				NM_004417.2		5				1843																		RefSeq	ILMN_20700	DUSP1	NM_004417.2	S	-	172128082-172128131	HVH1; MKP1; MKP-1; PTPN10; CL100							-1	chrna:
37668	ILMN_1813275	DUSP22	Homo sapiens			GGGTTTTATCTCTGGTTTGTGTTCTCCGTGGTGGAATTGACCGAAAGCTC				XM_941691.1						56940																		RefSeq	ILMN_138115	DUSP22	XM_941691.1	A										-1	chrna:
14264	ILMN_1701441	EDG2	Homo sapiens			CTTTGTTTGAGGGACTCGTTATCCAGCTCTTGGTAGCCACACCTGCAATG				NM_057159.2		9				1902																		RefSeq	ILMN_27567	EDG2	NM_057159.2	A	-	112675936-112675985	Mrec1.3; edg-2; rec.1.3; LPA1; LPAR1; vzg-1; Gpcr26							-1	chrna:
3303	ILMN_1751904	EDNRB	Homo sapiens			TTGCCTGGTCCTTGTCTTTGCCCTCTGCTGGCTTCCCCTTCACCTCAGCA				NM_000115.1		13				1910																		RefSeq	ILMN_12589	EDNRB	NM_000115.1	A	-	77372711-77372760	ABCDS; HSCR2; ETRB; HSCR; ETB							-1	chrna:
31368	ILMN_2108735	EEF1A2	Homo sapiens			AGCGCTCGCCACGCTCAGTGCCCGTTTTACCAATAAACTGAGCGACCCCA				NM_001958.2		20				1917																		RefSeq	ILMN_2929	EEF1A2	NM_001958.2	S	-	61589812-61589861	EEF1AL; STN; HS1; EF-1-alpha-2; EF1A							-1	chrna:
1983	ILMN_1761463	EFHD2	Homo sapiens			CAGCGCAGCAGCCTCGGACCCGGATTGCGTTTGCCTTAGCGGATATGTTT				NM_024329.4		1				79180																		RefSeq	ILMN_13273	EFHD2	NM_024329.4	S	+	15629208-15629257	MGC4342; RP3-467K16.3							-1	chrna:
6792	ILMN_2373791	ENPP2	Homo sapiens			CATGAAGATGCACACAGCTAGGGTGCGTGACATTGAACATCTCACCAGCC				NM_001040092.1		8				5168																		RefSeq	ILMN_177018	ENPP2	NM_001040092.1	A	-	120639027-120639076	NPP2; ATX; LysoPLD; ATX-X; PDNP2; PD-IALPHA; FLJ26803							-1	chrna:
41130	ILMN_1740216	ERCC3	Homo sapiens			ACTCATCGCGGAGCAAGGCGCCCAGCAAACATGTACACCCGCTCTTCAAG				NM_000122.1		2				2071																		RefSeq	ILMN_17573	ERCC3	NM_000122.1	S	-	127731656-127731705	RAD25; XPB; BTF2; TFIIH; GTF2H							-1	chrna:
21483	ILMN_1795495	ERCC5	Homo sapiens			CGCAGAACTCAGTGAAGGAAGCTCCCGTGAAGAATGGAGGTGCGACCACC				NM_000123.2		13				2073																		RefSeq	ILMN_13388	ERCC5	NM_000123.2	S	+	102326079-102326128	XPG; ERCM2; UVDR; XPGC; COFS3							-1	chrna:
35004	ILMN_2396648	EXOSC1	Homo sapiens			ACACCAAGATGCTGCTGTCTTTATTCAAACACCTGGCGTCGGCCAACAGC				NM_016046.3		10				51013																		RefSeq	ILMN_42613	EXOSC1	NM_016046.3	A	-	99186093-99186142	SKI4; Ski4p; Csl4p; RP11-452K12.9; p13; CGI-108; CSL4; hCsl4p							-1	chrna:
12693	ILMN_1745299	FABP7	Homo sapiens			AAAGAGGGGAAAGGGCAAGGATGGTGGAGGCTTTCTGTGCTACCTGGAAG				NM_001446.3		6				2173																		RefSeq	ILMN_13498	FABP7	NM_001446.3	S	+	123142619-123142638:123142639-123142668	B-FABP; BLBP; MRG; DKFZp547J2313; FABPB							-1	chrna:
36997	ILMN_2410038	FAM111A	Homo sapiens			GTGCCGGTAGTACAGATAACCCCTCATAAAGATGCTTATCTAACCTCCCC				NM_022074.2		11				63901																		RefSeq	ILMN_25514	FAM111A	NM_022074.2	A	+	58678868-58678917	FLJ22794; KIAA1895; DKFZp686A06175							-1	chrna:
14226	ILMN_1811373	FAM20B	Homo sapiens			CCCTTCAATTCCTCAAGTCTGGGTGGTGACAAGGTAGGGGCTAGGTACTG				NM_014864.2		1				9917																		RefSeq	ILMN_9442	FAM20B	NM_014864.2	S	+	177311991-177312040								-1	chrna:
23385	ILMN_1712684	FAM20C	Homo sapiens			CTCAAGGCCAAGCTCACCCCTCAAGTGCTCTCACACTCGGGACCTAATTC				NM_020223.2						56975																		RefSeq	ILMN_5460	FAM20C	NM_020223.2	I			DMP4							-1	chrna:
27704	ILMN_2368773	FAM3C	Homo sapiens			AGAGTGAGGCTGGAGGTGGCAGCTTCACAGAACTGGAGAACCAGGCCAAG				NM_001040020.1		7				10447																		RefSeq	ILMN_180739	FAM3C	NM_001040020.1	A	-	120776999-120777048	GS3786							-1	chrna:
27705	ILMN_1777261	FAM3C	Homo sapiens			AGTGAGGCTGGAGGTGGCAGCTTCACAGAACTGGAGAACCAGGCCAAGTC				NM_001040020.1		7				10447																		RefSeq	ILMN_3091	FAM3C	NM_001040020.1	S	-	120776997-120777046	GS3786							-1	chrna:
41893	ILMN_1716730	FAM44B	Homo sapiens			TAGGCATAAGGAAACTCGTTTGCAGGCTCTCTGTCCAGGGCTGCTTCCTG				NM_138369.1		5				91272																		RefSeq	ILMN_26871	FAM44B	NM_138369.1	S	-	172967249-172967298								-1	chrna:
23778	ILMN_1808011	FAM46B	Homo sapiens			GAGCCCTCCTGCCTGGGAGCTTGTTCTTTGGAAGGTGCTGAGCCTGAATT				NM_052943.2		1				115572																		RefSeq	ILMN_9808	FAM46B	NM_052943.2	S	-	27204252-27204301	MGC16491; MGC20845; RP11-344H11.8							-1	chrna:
26780	ILMN_3264466	FAM54B	Homo sapiens			CTGAACAACCAAATCTACCCTCCACGGCCCTGAGGCCTTATCAGTTCCAC				NM_019557.5		1				56181																		RefSeq	NM_019557.5	FAM54B	NM_019557.5	M	+	26031726-26031775	HYST1888; MST116; MSTP116							-1	chrna:
781	ILMN_1757440	FAM69B	Homo sapiens			GATTCCAGCACCACAGACATGAGACCCCAGCTCGGAGCAAAGGCGGACAT				XM_001130258.1						138311																		RefSeq	ILMN_138278	FAM69B	XM_001130258.1	A										-1	chrna:
24113	ILMN_1719870	FAM72A	Homo sapiens			GCATTCAGAGCTACAAAGGAATAGGAAAGTAGGGTAGTGTTGGATTCTGG				NM_207418.2		1				653573																		RefSeq	ILMN_19354	FAM72A	NM_207418.2	S	+	111130-111179	RP11-312O7.1; MGC57827; GCUD2							-1	chrna:
1386	ILMN_1727479	FAM79A	Homo sapiens			TGCAGGGCTGCCTCAGAAGCTGGCTGGGGACTCTAGCCTCTGTGTTCATA				NM_182752.3		1				127262																		RefSeq	ILMN_27261	FAM79A	NM_182752.3	S	+	3536433-3536482	RP11-46F15.3; FLJ21811							-1	chrna:
2624	ILMN_1758728	FANCG	Homo sapiens			TCCTGGACTGGTGAGATTGGTGGTAGGCCTGTGAAATTTGCCCTAGTTAC				NM_004629.1		9				2189																		RefSeq	ILMN_23865	FANCG	NM_004629.1	S	-	35063949-35063998	XRCC9; FAG							-1	chrna:
21410	ILMN_3247578	FAT1	Homo sapiens			CCCAACTACTGTCATCGTGAGGTTTTCATCGGCTGTGCCATTTCCCAACG				NM_005245.3		4				2195																		RefSeq	NM_005245.3	FAT1	NM_005245.3	S	-	187746527-187746576	ME5; hFat1; CDHF7; FAT1							-1	chrna:
1055	ILMN_1693438	FBXL12	Homo sapiens			AGGGGCACCTGAGGGTCTGAGCCCCCTTATGAGTACCCAAGAAGGACTGT				NM_017703.1		19				54850																		RefSeq	ILMN_24751	FBXL12	NM_017703.1	S	-	9782152-9782201	Fbl12; FLJ20188							-1	chrna:
36215	ILMN_1710676	FBXO5	Homo sapiens			GATGGCAAGCTCCTCAAAGCCAGTTGTAAAATAGGTCCCCTGCCTGGTAC				NM_012177.2		6				26271																		RefSeq	ILMN_9763	FBXO5	NM_012177.2	S	-	153334023-153334072	Fbxo31; FBX5; EMI1							-1	chrna:
46593	ILMN_1693009	FGL2	Homo sapiens			CCTTCTGGGAACTGTGGGCTGTACTACAGTTCAGGCTGGTGGTTTGATGC				NM_006682.1		7				10875																		RefSeq	ILMN_19861	FGL2	NM_006682.1	S	-	76663704-76663753	pT49; T49							-1	chrna:
24992	ILMN_1663667	FLAD1	Homo sapiens			CTGAGCCCAGGAGGACACCCCACATACCGTCCAGCCTATCTACTGGAGAA				NM_201398.1		1				80308																		RefSeq	ILMN_17093	FLAD1	NM_201398.1	A	+	153232057-153232106	RP11-307C12.7; MGC40255; MGC31803; FAD1; FADS; PP591							-1	chrna:
27775	ILMN_1677038	FLJ21986	Homo sapiens			ACTGTTACCATCTGACTGAGGTTACTCTGGTATTTATCTCTTCGCTGCTG				NM_024913.3		7				79974																		RefSeq	ILMN_22149	FLJ21986	NM_024913.3	S	+	120724622-120724671	FLJ26813							-1	chrna:
9329	ILMN_2152429	FLJ40142	Homo sapiens			CCCAGCCAACAGAAGTGCATGTCCACTGTGCGGGCCAGTGTGTGTTTACA				NM_207435.1		12				400073																		RefSeq	ILMN_5279	FLJ40142	NM_207435.1	S	-	108963699-108963748	FLJ11385							-1	chrna:
20856	ILMN_1664922	FLNB	Homo sapiens			GAGGTGTAGGGAATTTTGCCTGCCTTCCTGCAGACCTGAGCTGGCTTTGG				NM_001457.1		3				2317																		RefSeq	ILMN_21371	FLNB	NM_001457.1	S	+	58132673-58132722	FLN1L; filamin B; FH1; DKFZp686A1668; AOI; ABP-278; SCT; TAP; TABP							-1	chrna:
4378	ILMN_1771841	FOSL1	Homo sapiens			CACTGCCACACTCTCCATCACCCTCTTCCTGTGATCCACCCAACCCTATC				NM_005438.2		11				8061																		RefSeq	ILMN_2127	FOSL1	NM_005438.2	S	-	65416554-65416603	fra-1; FRA1							-1	chrna:
42532	ILMN_1738816	FOXO1	Homo sapiens			CAACCTGGCATTACAGTTGGCCTCTCCTTGAGGTGGGCACAGCCTGGCAG				NM_002015.3						2308																		RefSeq	ILMN_5656	FOXO1	NM_002015.3	S			FKHR; FKH1; FOXO1A							-1	chrna:
8761	ILMN_1665964	GAB2	Homo sapiens			CGAGGGGGTCCCCAAGAGATCCAGGCTGTCATGTGATTTATGGTGGCATG				NM_080491.1		11				9846																		RefSeq	ILMN_3317	GAB2	NM_080491.1	A	-	77604355-77604404	KIAA0571							-1	chrna:
22942	ILMN_1651819	GALNT11	Homo sapiens			GCTCTGAGTGTCCACGGGTGAAGAAGTGAGTGTCCACGGGTGAAGAAGTG				NM_022087.2						63917																		RefSeq	ILMN_5237	GALNT11	NM_022087.2	S			FLJ21634; MGC71630							-1	chrna:
1001	ILMN_2364110	GBA	Homo sapiens			GGCTCTGCTGTTGTGGTCGTGCTAAACCGCTCCTCTAAGGATGTGCCTCT				NM_001005742.1		1				2629																		RefSeq	ILMN_28933	GBA	NM_001005742.1	A	-	153471494-153471515:153471610-153471637	GCB; GBA1; GLUC							-1	chrna:
167	ILMN_1746378	GHDC	Homo sapiens			GCACACCGATGGTTTCCTGTATCACAGCCCAAAGAGGTTCTCTGGTGGCC				NM_032484.3		17				84514																		RefSeq	ILMN_1769	GHDC	NM_032484.3	S	-	37594936-37594985	D11LGP1; LGP1							-1	chrna:
863	ILMN_1754272	GINS3	Homo sapiens			GGCCCATTAGACTGTTTGCAGGGCATCACTGCTTCCCCCTGACACCTCAC				NM_022770.2		16				64785																		RefSeq	ILMN_7033	GINS3	NM_022770.2	S	+	56997199-56997248	FLJ13912; PSF3							-1	chrna:
11247	ILMN_1764380	GLTP	Homo sapiens			CGCCTCACTGCCTTAACCTTAACTGTTCTTCCTGGCGCTAAAAAGAGCTG				NM_016433.3		12				51228																		RefSeq	ILMN_30280	GLTP	NM_016433.3	S	-	108773276-108773325								-1	chrna:
37804	ILMN_1738989	GOLSYN	Homo sapiens			CCCTGCCGTGTCGTCTGAGGTACCCGTTCTTATCCTAGTGGTTCAGGAAG				NM_001099743.1						55638																		RefSeq	ILMN_13950	GOLSYN	NM_001099743.1	S			FLJ20366; SYBU							-1	chrna:
2044	ILMN_1789502	GPC4	Homo sapiens			GTCCCAGGCCAAAGACTAACAACTGCCTTGGGAATCCCTTCCTTGTGTCC				NM_001448.2		X				2239																		RefSeq	ILMN_11696	GPC4	NM_001448.2	S	-	132263112-132263161	K-glypican							-1	chrna:
12095	ILMN_1735438	GPM6B	Homo sapiens			TACATGTCCTATCACCTGTTCATTGTGGCCTGTGCAGGAGCTGGTGCCAC				NM_001001995.1		X				2824																		RefSeq	ILMN_550	GPM6B	NM_001001995.1	A	-	13704290-13704339	MGC54284; M6B; MGC17150							-1	chrna:
39391	ILMN_1685415	HBP1	Homo sapiens			AGGTGGCAGCAGCCATCCGTTATTATTTCCAATGGAGACCTAGCCCAGGC				NM_012257.3		7				26959																		RefSeq	ILMN_4225	HBP1	NM_012257.3	S	+	106629731-106629780	FLJ16340							-1	chrna:
14005	ILMN_1810805	HEATR5B	Homo sapiens			GGCTGCCAGACAACCAGCCCCCGCCATACATTCTGCACCAACAATTAAGC				NM_019024.1		2				54497																		RefSeq	ILMN_25274	HEATR5B	NM_019024.1	S	-	37062156-37062205	KIAA1414							-1	chrna:
13076	ILMN_1659316	HEPACAM	Homo sapiens			GGAGTACCTGCTGGTCAGCCTTGAGATGCACAGGTGAAGGTTAGGGTGAG				NM_152722.4						220296																		RefSeq	ILMN_18633	HEPACAM	NM_152722.4	S			FLJ25530							-1	chrna:
19950	ILMN_1678037	HIRIP3	Homo sapiens			GCAGCTCCCAAGGACACAAGCTGTTGGGATGCTACTTCTCAGCTTCACGC				NM_003609.2		16				8479																		RefSeq	ILMN_5112	HIRIP3	NM_003609.2	S	-	29911875-29911924								-1	chrna:
29558	ILMN_1659047	HIST2H2AA3	Homo sapiens			CGACTTTCCCGATCGCCAGGCAGGAGTTTCTCTCGGTGACTACTATCGCT				NM_003516.2		1				8337																		RefSeq	ILMN_26733	HIST2H2AA3	NM_003516.2	S	-	148080892-148080941	H2a-615; H2A; H2AFO; HIST2H2AA; H2A/q; H2A/O; H2A.2							-1	chrna:
27356	ILMN_3242900	HIST2H2AA4	Homo sapiens			CTACATGGCTGCGGTCCTCGAGTATCTGACCGCCGAGATCCTGGAGCTGG				NM_001040874.1		1				723790																		RefSeq	NM_001040874.1	HIST2H2AA4	NM_001040874.1	S	+	148089454-148089503	H2A/R							-1	chrna:
23823	ILMN_2311537	HMGA1	Homo sapiens			CCCCCCAAGGTTCTGGTTCCATTTTTCCTCTGTTCACAAACTACCTCTGG				NM_145899.1		6				3159																		RefSeq	ILMN_5105	HMGA1	NM_145899.1	A	+	34321559-34321608	MGC12816; MGC4854; HMG-R; MGC4242; HMGIY							-1	chrna:
5201	ILMN_1657395	HMGCR	Homo sapiens			CTTGGATGGACCCACGAACGCTCTTAGCTTTCTCAGGGGGTCAGCAGAGT				NM_000859.1		5				3156																		RefSeq	ILMN_20713	HMGCR	NM_000859.1	S	+	74693189-74693238								-1	chrna:
10959	ILMN_1797728	HMGCS1	Homo sapiens			GCCGGCAATGGGCAGGCCTGCAAATACTGGCACAGAGCATTAATCATACA				NM_002130.6						3157																		RefSeq	ILMN_18980	HMGCS1	NM_002130.6	S			MGC90332; HMGCS							-1	chrna:
18680	ILMN_1717381	HOXD1	Homo sapiens			GCGGTTTCTACCTCTCTATGTGCCTGAGTGATGATACAATCGCTGTTTAG				NM_024501.1		2				3231																		RefSeq	ILMN_12865	HOXD1	NM_024501.1	S	+	176763634-176763683	HOX4G; HOX4; Hox-4.7							-1	chrna:
7359	ILMN_1710937	IFI16	Homo sapiens			CCTTTCACACTTGTGGCTGATGTGAATGCTGACCGAAACATGGAGATCCC				NM_005531.1		1				3428																		RefSeq	ILMN_2725	IFI16	NM_005531.1	S	+	157288195-157288244	IFNGIP1; PYHIN2							-1	chrna:
18665	ILMN_1669362	IGFBP6	Homo sapiens			GCAACTCCAGACTGAGGTCTACCGAGGGGCTCAAACACTCTACGTGCCCA				NM_002178.2		12				3489																		RefSeq	ILMN_5216	IGFBP6	NM_002178.2	S	+	51781127-51781176	IBP6							-1	chrna:
35205	ILMN_1753502	IGSF11	Homo sapiens			CTCTTCTCCTGCAAGCGTAGTCTTCACAGGGAGTGGCTTCCTGACATTTT				NM_001015887.1		3				152404																		RefSeq	ILMN_551	IGSF11	NM_001015887.1	A	-	120102495-120102544	VSIG3; Igsf13; MGC35227; BT-IgSF; CXADRL1							-1	chrna:
43836	ILMN_1688152	IL27RA	Homo sapiens			CACTGCATTTGGGCACCATCTCAGCTCCCTTGCATCCAGGTGCAGCATGG				NM_004843.2		19				9466																		RefSeq	ILMN_9407	IL27RA	NM_004843.2	S	+	14024744-14024793	zcytor1; WSX1; IL27R; TCCR; CRL1							-1	chrna:
3943	ILMN_2198878	INPP4B	Homo sapiens			CTTGAGAGATGAGCACCAGTTACACAAGGACTTCTTTATCCGAGCGCTGG				NM_003866.1		4				8821																		RefSeq	ILMN_22637	INPP4B	NM_003866.1	S	-	143222645-143222694	MGC132014							-1	chrna:
12797	ILMN_1774589	IQCC	Homo sapiens			GTGTGGCTAAGGAGTTACCTGGGGGAAGTAGAATGAGAGGTCTGTTGGGA				NM_018134.1		1				55721																		RefSeq	ILMN_14474	IQCC	NM_018134.1	S	+	32446803-32446852	MGC120341; FLJ10547; RP4-622L5.6							-1	chrna:
750	ILMN_1700432	ITPKB	Homo sapiens			CCCACTTGGTAGAAAGAGCCCAGAAGCAGCCCTGGCCCTGTAAGATGGAC				NM_002221.2		1				3707																		RefSeq	ILMN_12468	ITPKB	NM_002221.2	S	-	224886280-224886329	IP3KB; IP3K; PIG37; IP3K-B							-1	chrna:
34667	ILMN_1764177	JARID2	Homo sapiens			GAGCTTGCCAGTGGTGACTGCCAGGAACGTCCTATGATCCACTTTGTTGG				NM_004973.2		6				3720																		RefSeq	ILMN_15843	JARID2	NM_004973.2	S	+	15629902-15629951	JMJ							-1	chrna:
28143	ILMN_1722532	JMJD1A	Homo sapiens			CCAGGCTGTAAAAGCAAAACCTCGTATCAGCTCTGGAACAATACCTGCAG				NM_018433.3		2				55818																		RefSeq	ILMN_25544	JMJD1A	NM_018433.3	S	+	86572991-86573040	JHMD2A; JMJD1; TSGA; KIAA0742; DKFZp686A24246; DKFZp686P07111							-1	chrna:
9593	ILMN_1810214	JUND	Homo sapiens			GCTACGAGTCCACATTCCTGTTTGTAATCCTTGGTTCGCCCGGTTTTCTG				NM_005354.3						3727																		RefSeq	ILMN_29325	JUND	NM_005354.3	S										-1	chrna:
24116	ILMN_1808071	KIF14	Homo sapiens			GCTTGCTGGCACAGTAGTTTACCCTGTTATCTGTGTTTCATAATGGGGGC				NM_014875.1		1				9928																		RefSeq	ILMN_29781	KIF14	NM_014875.1	S	-	198788286-198788335	KIAA0042; MGC142302							-1	chrna:
39826	ILMN_1753063	KIF15	Homo sapiens			GAAGCAGGTGGAGTGTCTTGCTGAGGAAAATGGAAAGTTGGTAGGTCACC				NM_020242.1		3				56992																		RefSeq	ILMN_6188	KIF15	NM_020242.1	S	+	44868721-44868770	NY-BR-62; HKLP2; KNSL7							-1	chrna:
7983	ILMN_1751656	KLF11	Homo sapiens			AGGTGGGCTCCCCTCGTGCACTTTATTGCCTGGGCAGTTTTGCTTGATCT				XM_001129527.1						8462																		RefSeq	ILMN_138189	KLF11	XM_001129527.1	A										-1	chrna:
31381	ILMN_1767579	KRR1	Homo sapiens			CCCATCAATCATCTGGTCCTCTGGGTACTGGTGAGCATCCCTGGTCTTCA				NM_007043.6						11103																		RefSeq	ILMN_21056	KRR1	NM_007043.6	S			RIP-1; HRB2							-1	chrna:
42097	ILMN_3263974	KRT18P13	Homo sapiens			TCGAGGCCCGCTATGCCTTGCAGAGGGAGCAGCTCAACGGGATCCTGCTG				XM_001726959.1		9				392371																		RefSeq	XM_001726959.1	KRT18P13	XM_001726959.1	M	+	99502526-99502575								-1	chrna:
21552	ILMN_2135306	KRTAP10-10	Homo sapiens			AGGCCTGGTTCCACCCTGGGCAGCACCCCCTCTAGTTCTAATAAAGCCGC				NM_181688.1		21				353333																		RefSeq	ILMN_26494	KRTAP10-10	NM_181688.1	S	+	44882735-44882784	KRTAP18.10; KAP18.10; KRTAP18-10; KAP10.10							-1	chrna:
1408	ILMN_1757317	LARS	Homo sapiens			GTCCTGGGAAAGGAGTACACCGAGAAGACCCCCATTTCTGAGCATGCTGT				NM_020117.9						51520																		RefSeq	ILMN_11552	LARS	NM_020117.9	S			PIG44; KIAA1352; LRS; hr025Cl; FLJ10595; LEURS; FLJ21788; LEUS; LARS1; RNTLS; HSPC192							-1	chrna:
44438	ILMN_1754149	LETMD1	Homo sapiens			GTATTACAGCCCTCTGTGGATCTTCAACTCTGCTGCCTCCACTGTGATGC				NM_001024668.1		12				25875																		RefSeq	ILMN_15496	LETMD1	NM_001024668.1	A	+	49740189-49740238	DKFZp586A011; HCCR-2; 1110019O13Rik; HCCR1							-1	chrna:
11749	ILMN_1803788	LGALS3	Homo sapiens			CCTCACCAGTGCTTCATATACCATGATATAATCTGAAAGGGGCAGATTAA				NM_002306.1		14				3958																		RefSeq	ILMN_14333	LGALS3	NM_002306.1	S	+	54681712-54681742:54681743-54681761	GAL3; MAC2; LGALS2; CBP35; GALBP							-1	chrna:
44394	ILMN_1754969	LMCD1	Homo sapiens			CTGCAAGGGGACTCTGGGAGGAGTTTTCCAGAATGCAATTCCGAGTGAGC				NM_014583.2		3				29995																		RefSeq	ILMN_20151	LMCD1	NM_014583.2	S	+	8584584-8584633								-1	chrna:
30500	ILMN_3248057	LOC100132439	Homo sapiens			CCTCACTAGACAGAGGAGCTCCAAACCTGCCCATCTCATCCCATGCACCG				XM_001719283.1		9				100132439																		RefSeq	XM_001719283.1	LOC100132439	XM_001719283.1	S	+	44939306-44939355								-1	chrna:
35542	ILMN_2380243	LOC57228	Homo sapiens			AACCTACAGAAGGTGAGCCCAGTGCCATCGTCCAGATGGAGAGTGACTTG				NM_001031628.1		12				57228																		RefSeq	ILMN_22527	LOC57228	NM_001031628.1	A	-	49926027-49926076	MGC149454; MGC149453							-1	chrna:
40712	ILMN_1804415	LOC57228	Homo sapiens			TGGCTGCTCTACTCTGTCCCCTACCTGGTCACCTAGTGATAGCCCCAGTG				NM_001033873.1		12				57228																		RefSeq	ILMN_22527	LOC57228	NM_001033873.1	A	-	49925603-49925652	MGC149454; MGC149453							-1	chrna:
42380	ILMN_1793287	LOC642755	Homo sapiens			TGGCAAAACAGATATCATGCTGGTGAGTGCCACGTTACTCCCCTGGCTGG				XM_926382.2		15				642755																		RefSeq	ILMN_32084	LOC642755	XM_926382.2	A	-	20708606-20708655								-1	chrna:
42381	ILMN_1655244	LOC642755	Homo sapiens			GCTGGGTTTAGCCCGAGGCTGGTCTTAGATGCAGCGACTGTTTCAGAGTG				XM_926382.2		15				642755																		RefSeq	ILMN_32084	LOC642755	XM_926382.2	I	-	20708747-20708796								-1	chrna:
8631	ILMN_3206343	LOC644914	Homo sapiens			ACATACTTGGCTCTCCAACGCCAGCGCCGCCTCTCGCTCGCCGAGCTCCA				XM_001128558.2						644914																		RefSeq	XM_001128558.2	LOC644914	XM_001128558.2	A										-1	chrna:
16798	ILMN_3300663	LOC728661	Homo sapiens			AGCAAACGGTTCTGTTAATTAGCGAGTCACTGTTGATTCTGCTGTGGTGG				XM_001717735.1		1				728661																		RefSeq	XM_001717735.1	LOC728661	XM_001717735.1	M	-	1582925-1582974								-1	chrna:
15571	ILMN_3298716	LOC729231	Homo sapiens			ACCCTACCCCCGTGACAGAAGGTGCCACTTTACCCACCTAGAACACCAAC				XR_038105.1						729231																		RefSeq	XR_038105.1	LOC729231	XR_038105.1	M										-1	chrna:
580	ILMN_3300198	LOC729580	Homo sapiens			TGCTCTCCATCCTGGATCGTAAGGAGGCATCATCAGGCTGTGTTCCTGGA				XM_001130700.1		20				729580																		RefSeq	XM_001130700.1	LOC729580	XM_001130700.1	M	-	33328401-33328429:33328430-33328450								-1	chrna:
23251	ILMN_3248803	LOC729680	Homo sapiens			GACTGGCACTTTCATGGCTGTTCATGGGCATCTCTTGGTCTATGACGACG				XR_040503.1						729680																		RefSeq	XR_040503.1	LOC729680	XR_040503.1	S										-1	chrna:
32520	ILMN_3297472	LOC729854	Homo sapiens			CAGAAACTGCATGCAGCGGCAACATGAGCAAAGATAAGTGTTGGGACCCG				XM_001134103.2		2				729854																		RefSeq	XM_001134103.2	LOC729854	XM_001134103.2	M	+	86906318-86906354:86906355-86906367								-1	chrna:
21601	ILMN_2128795	LRIG1	Homo sapiens			CAAGGTCCTTCAAATGTTCCTTTGGCCAAAAGCTGAAGGGAGTTACTGAG				NM_015541.2		3				26018																		RefSeq	ILMN_3319	LRIG1	NM_015541.2	S	-	66512189-66512238	LIG-1; LIG1; DKFZP586O1624							-1	chrna:
38587	ILMN_2127605	LRP3	Homo sapiens			CTGGTGACCGCCACAGCCCCGCTTTGTAACCAGGGAATACACAGTCATTT				NM_002333.1		19				4037																		RefSeq	ILMN_12327	LRP3	NM_002333.1	S	+	38390358-38390383								-1	chrna:
33349	ILMN_1678165	LSM7	Homo sapiens			CGGCACCATTGAGTACATGCGAGACCCTGACGACCAGTACAAGCTCACGG				NM_016199.1		19				51690																		RefSeq	ILMN_15479	LSM7	NM_016199.1	S	-	2272794-2272821:2275124-2275145	YNL147W							-1	chrna:
40807	ILMN_2363498	LSR	Homo sapiens			TCACCCCGCCGAGCACCGCCGAGTCAGGGAGCAGGTCTCCCACGAGTAAT				NM_205835.2		19				51599																		RefSeq	ILMN_2781	LSR	NM_205835.2	A	+	40450062-40450111	MGC48312; LISCH7; MGC48503; MGC10659							-1	chrna:
5309	ILMN_2167805	LUM	Homo sapiens			CTGTCAAATGATGTGCAAAACCTTTTACTGGTTGCATGGAAATCAGCCAA				NM_002345.3		12				4060																		RefSeq	ILMN_4223	LUM	NM_002345.3	S	-	90021774-90021823	SLRR2D; LDC							-1	chrna:
5310	ILMN_1790529	LUM	Homo sapiens			GCGTTTGGATGGCAATCGCATCTCAGAAACCAGTCTTCCACCGGATATGT				NM_002345.3		12				4060																		RefSeq	ILMN_4223	LUM	NM_002345.3	S	-	90022113-90022162	SLRR2D; LDC							-1	chrna:
24244	ILMN_2388484	MAP2	Homo sapiens			TCAGCTTGCCACTTTGGCTGAGGATGTCACTGCTGCACTCGCTAAGCAGG				NM_002374.3		2				4133																		RefSeq	ILMN_38764	MAP2	NM_002374.3	A	+	210303309-210303358	MAP2B; MAP2C; DKFZp686I2148; MAP2A							-1	chrna:
22959	ILMN_2100689	MAP2K4	Homo sapiens			TTCTGACTGTCCAGGAGCTAATCTGACCGTTCTATTGTGTGGATGACCAC				NM_003010.2		17				6416																		RefSeq	ILMN_23313	MAP2K4	NM_003010.2	S	+	11987315-11987364	MEK4; SERK1; MKK4; JNKK; MAPKK4; JNKK1; SEK1; PRKMK4							-1	chrna:
26143	ILMN_1651719	MBTPS1	Homo sapiens			CACCAAAGACTCGGGAGAACTGGAAAGGCTGTCTGGGGTCTTCTGACTGC				NM_003791.2		16				8720																		RefSeq	ILMN_5443	MBTPS1	NM_003791.2	A	-	82645250-82645299	MGC138712; KIAA0091; SKI-1; S1P; MGC138711; PCSK8							-1	chrna:
37029	ILMN_1653319	MC1R	Homo sapiens			TGACTCAGTGACCAGTGCCTGTGAGCATGGGGCCAGGAAAGTCTGGTAAT				NM_002386.2		16				4157																		RefSeq	ILMN_25536	MC1R	NM_002386.2	S	+	88514810-88514859	MSH-R; MGC14337							-1	chrna:
13043	ILMN_1736042	ME1	Homo sapiens			CCACAGTTTATCCTGAACCGCAAAACAAAGAAGCATTTGTCCGCTCCCAG				NM_002395.3						4199																		RefSeq	ILMN_14746	ME1	NM_002395.3	S			MES; HUMNDME							-1	chrna:
23031	ILMN_1671603	MED30	Homo sapiens			CGGGCTGGCCCACCTCGTTTTGCTAGTGAAGAGAGGCGAGAAATTGCTGA				NM_080651.1		8				90390																		RefSeq	ILMN_7158	MED30	NM_080651.1	S	+	118612188-118612237	TRAP25; MGC9890; MED30; THRAP6							-1	chrna:
16593	ILMN_1742544	MEF2C	Homo sapiens			GTGTTTCTCATTGTAAAAGGCTGCCGCTGGGTGGCAGAAGCCAAGAGACC				NM_002397.2		5				4208																		RefSeq	ILMN_19661	MEF2C	NM_002397.2	S	-	88052034-88052083								-1	chrna:
10366	ILMN_1715175	MET	Homo sapiens			GTCTCTACCAGGGTCAAGAGCATGAACGCATCAATAGAAAGAACTCGGGG				NM_000245.2		7				4233																		RefSeq	ILMN_12011	MET	NM_000245.2	S	+	116225375-116225424	RCCP2; HGFR; AUTS9							-1	chrna:
40886	ILMN_2304186	MITF	Homo sapiens			AAATGATCCACACCACTCCCCCGATTCCCGGGTGCAGAATTGTAACTCGG				NM_198158.1		3				4286																		RefSeq	ILMN_1045	MITF	NM_198158.1	A	+	70099648-70099697	WS2A							-1	chrna:
34636	ILMN_1710217	MLANA	Homo sapiens			GGCAATTTAGCTCTCTTGGGTTCCCAAATCCCTCTCACAAGAATGTGCAG				NM_005511.1		9				2315																		RefSeq	ILMN_22830	MLANA	NM_005511.1	S	+	5899745-5899794	MART1; MART-1							-1	chrna:
22444	ILMN_1657977	MSRB2	Homo sapiens			TTCCCTTGCCACCCCTTCACGTGCACCCTCAATTTCCACAATTCACTTGA				NM_012228.2		10				22921																		RefSeq	ILMN_1402	MSRB2	NM_012228.2	S	+	23449812-23449861	PILB; CBS-1; MSRB; CGI-131; CBS1; MGC26104							-1	chrna:
18233	ILMN_1686664	MT2A	Homo sapiens			GAACCCGCGTGCAACCTGTCCCGACTCTAGCCGCCTCTTCAGCACGCCAT				NM_005953.2		16				4502																		RefSeq	ILMN_11198	MT2A	NM_005953.2	S	+	55200021-55200068:55200069-55200070	MT2							-1	chrna:
3684	ILMN_3226059	MYCNOS	Homo sapiens			ATGCAGCACCCACCCTGCGAGCCTGGCAATTGCTTGTCATTAAAAGAAAA				XR_039828.1		2				10408																		RefSeq	XR_039828.1	MYCNOS	XR_039828.1	A	-	15997765-15997814								-1	chrna:
29516	ILMN_1656111	MYLIP	Homo sapiens			GCATTTTGGAAGCTGGTCAGCTAGCAGGTTTTCTGGGATGTCGGGAGACC				NM_013262.3		6				29116																		RefSeq	ILMN_9457	MYLIP	NM_013262.3	S	+	16256091-16256140	MIR							-1	chrna:
4427	ILMN_1805999	MYO1D	Homo sapiens			AGGAGGGCCTGGGTTTGGGTTCTTTCCTCCCAGCCTTTGGATGGTGCCTT				NM_015194.1		17				4642																		RefSeq	ILMN_22644	MYO1D	NM_015194.1	S	-	27844050-27844099	KIAA0727; myr4							-1	chrna:
42064	ILMN_2095840	MYST3	Homo sapiens			GTTGGAAGAGATGGCGCAGATGTGTGTCAGAAGGGAGATCACGGTGTGAG				NM_006766.2		8				7994																		RefSeq	ILMN_19742	MYST3	NM_006766.2	S	-	41907695-41907744	RUNXBP2; MOZ; ZNF220							-1	chrna:
40823	ILMN_1788538	NCALD	Homo sapiens			ATGTCACTCCTCTGCTGGGCTGTTCATTGTCATTGCTGTGTTCAGGGACC				NM_032041.1		8				83988																		RefSeq	ILMN_13197	NCALD	NM_032041.1	S	-	102768224-102768273	MGC74858							-1	chrna:
8080	ILMN_2343097	NCALD	Homo sapiens			AGCCTATGGAGTGGCCCGTAAATCAGTTGACTGTGTAGCTCTTGCCTGGC				NM_001040626.1						83988																		RefSeq	ILMN_178648	NCALD	NM_001040626.1	A			MGC33870; MGC74858							-1	chrna:
35970	ILMN_1665095	NELF	Homo sapiens			GGCGGGGGCCGGGCTTGGAACGATGTACGATACCCTCATAGTGACCATTA				NM_015537.3		9				26012																		RefSeq	ILMN_28709	NELF	NM_015537.3	S	-	139462516-139462565	RP11-48C7.1; MGC125369							-1	chrna:
3662	ILMN_1745817	NELL1	Homo sapiens			TCCACCTGAGGACGGTGTTTGGAGGTTGCCTTTTGGACCTACCACTTTGC				NM_006157.2		11				4745																		RefSeq	ILMN_2560	NELL1	NM_006157.2	S	+	21553272-21553321	FLJ45906; IDH3GL; NRP1							-1	chrna:
4333	ILMN_2360028	NFATC3	Homo sapiens			CGGGCCAGGGGGGTCTTTCTGCACCTTCATCCTTAATATGTCACAGTTTG				NM_173165.1		16				4775																		RefSeq	ILMN_27680	NFATC3	NM_173165.1	A	+	66783015-66783064	NFAT4; NFATX							-1	chrna:
11934	ILMN_1758049	NFIA	Homo sapiens			ACATGGCCCGCAAGGACAATGAATCCACTCACATTGCAGAACAATTCCGA				NM_005595.1		1				4774																		RefSeq	ILMN_27763	NFIA	NM_005595.1	S	+	61694189-61694238	KIAA1439; NFI-L; DKFZp434L0422							-1	chrna:
8363	ILMN_1773154	NFKBIA	Homo sapiens			GAGGACGAGCTGCCCTATGATGACTGTGTGTTTGGAGGCCAGCGTCTGAC				NM_020529.1		14				4792																		RefSeq	ILMN_6745	NFKBIA	NM_020529.1	S	-	34940976-34941017:34941351-34941358	IKBA; NFKBI; MAD-3							-1	chrna:
41758	ILMN_1660345	NGRN	Homo sapiens			ACATCCATTCTGCTTCCACGCATGGCTTCTGCCATTGGTTCTCTTCCCCC				NM_016645.2		15				51335																		RefSeq	ILMN_14282	NGRN	NM_016645.2	I	+	88610472-88610521	NEUGRIN; DSC92							-1	chrna:
41757	ILMN_1691506	NGRN	Homo sapiens			CCTGTGGTAGTGCTCCCAGTCTGACCTCTGTAGACCTTCAGTACTCACTC				NM_016645.2		15				51335																		RefSeq	ILMN_14282	NGRN	NM_016645.2	A	+	88616189-88616238	NEUGRIN; DSC92							-1	chrna:
1315	ILMN_1715508	NNMT	Homo sapiens			CAAGGGTCCAGAGAAGGAGGAGAAGTTGAGACAGGCGGTCAAGCAGGTGC				NM_006169.2		11				4837																		RefSeq	ILMN_22529	NNMT	NM_006169.2	S	+	113687980-113688029								-1	chrna:
35677	ILMN_1765558	NPAS2	Homo sapiens			CTGAGAACTCCAAGTCTGTGAGGGGAGAGGTTTTACAAGCCAGACAGGCC				NM_002518.3		2				4862																		RefSeq	ILMN_12125	NPAS2	NM_002518.3	S	+	100979294-100979343	MGC71151; PASD4; MOP4; FLJ23138							-1	chrna:
40489	ILMN_1778831	NTSR1	Homo sapiens			ACAAACCCCGTGTATCTCTCAATAAAGGTGGCCGAAGGGCCTCGATGTGG				NM_002531.2						4923																		RefSeq	ILMN_13518	NTSR1	NM_002531.2	S			NTR							-1	chrna:
7195	ILMN_1761425	OLFML2A	Homo sapiens			CTTAAGCAACCTGCTCAGGGTCACGTCTCCAACAGGCAGTAGAGTCAAGG				NM_182487.2						169611																		RefSeq	ILMN_12652	OLFML2A	NM_182487.2	S			PRO34319; FLJ00237							-1	chrna:
36758	ILMN_1716988	OPN3	Homo sapiens			CACCTTCCTGGTCTGTTGGATGCCTTATATCGTGATCTGCTTCTTGGTGG				NM_014322.2		1				23596																		RefSeq	ILMN_26329	OPN3	NM_014322.2	A	-	239827780-239827829	ECPN							-1	chrna:
3514	ILMN_2215631	OTUD6B	Homo sapiens			GGCCAATGTGGTTATGAACAAGATTTGTATGGTCAGCTTCTGTTCTTTCC				NM_016023.2		8				51633																		RefSeq	ILMN_22397	OTUD6B	NM_016023.2	S	+	92168117-92168166	CGI-77							-1	chrna:
35029	ILMN_1673673	PBK	Homo sapiens			GACTCTGGTTACAGATTGTCTTGATCTCTTGGATCTCCTCAGATCTTTGG				NM_018492.2		8				55872																		RefSeq	ILMN_4549	PBK	NM_018492.2	S	-	27723197-27723246	Nori-3; SPK; FLJ14385; TOPK							-1	chrna:
32413	ILMN_1733931	PDCD6	Homo sapiens			CCTATCTGTGAGGGAATGGAGCACAGGTGCAGTTAGATGCTGTTCTTCCT				NM_013232.3						10016																		RefSeq	ILMN_15265	PDCD6	NM_013232.3	S			ALG-2; MGC9123; MGC119050; MGC111017; PEF1B							-1	chrna:
20146	ILMN_1736441	PDXP	Homo sapiens			GGGGCTTTCGTGTCCCCCTGTGCGGTCAGTGTTTTCAGTACCACCTCTCT				NM_020315.4		22				57026																		RefSeq	ILMN_137856	PDXP	NM_020315.4	S	+	36392700-36392749	CIN; FLJ32703; PLP; dJ37E16.5							-1	chrna:
44185	ILMN_1661366	PGAM1	Homo sapiens			GCTAATCCCAGTCGGTGCCGCATCCCCAGCCCGCCGCCATGGCCGCCTAC				NM_002629.2		10				5223																		RefSeq	ILMN_26357	PGAM1	NM_002629.2	S	+	99176017-99176054:99176055-99176066	PGAMA							-1	chrna:
33637	ILMN_1704537	PHGDH	Homo sapiens			CCACATTCTTGGGCTGAACGCGGGCCTCTGACACTGCTTACACTGCACTC				NM_006623.2		1				26227																		RefSeq	ILMN_5800	PHGDH	NM_006623.2	S	+	120088264-120088313	PGD; 3-PGDH; PGDH; PDG; SERA; PGAD; MGC3017; 3PGDH							-1	chrna:
12106	ILMN_1726565	PIK3R2	Homo sapiens			TTTGGGACAAGAGCCCTGGTTTTCTACGCTGCCCTTGGCCACCACACTGC				NM_005027.2		19				5296																		RefSeq	ILMN_16775	PIK3R2	NM_005027.2	S	+	18142222-18142271	p85-BETA; P85B							-1	chrna:
45384	ILMN_2374340	PLAUR	Homo sapiens			GGAGCTTGAAAATCTGCCGCAGAATGGCCGCCAGTGTTACAGCTGCAAGG				NM_001005376.1		19				5329																		RefSeq	ILMN_24538	PLAUR	NM_001005376.1	A	-	48848309-48848358	CD87; UPAR; URKR							-1	chrna:
28033	ILMN_1699254	PLEKHH1	Homo sapiens			TGGAGCTGTGTTCACACTGAATTTGGGGTCAATCTATTTCCCCCACCCTC				NM_020715.2						57475																		RefSeq	ILMN_18939	PLEKHH1	NM_020715.2	S										-1	chrna:
4654	ILMN_1774604	PNKD	Homo sapiens			CATGCCTCTGTGCCTTCGCTCATGCTGTTTCTTCCGACTGGAATGCCTTC				NM_022572.2		2				25953																		RefSeq	ILMN_23079	PNKD	NM_022572.2	A	+	218919403-218919452	FKSG19; KIPP1184; DKFZp564N1362; MR1; FPD1; TAHCCP2; MGC31943; DYT8; KIAA1184; BRP17; MR-1; PDC							-1	chrna:
18117	ILMN_1657347	PODXL2	Homo sapiens			TTCCCGCTTCCCCCGACTTCACACGGCGGCTTCGGACCAACTCCCTCACT				NM_015720.1		3				50512																		RefSeq	ILMN_26815	PODXL2	NM_015720.1	S	+	128874153-128874202	PODLX2							-1	chrna:
14683	ILMN_1774336	POLE2	Homo sapiens			CCCAAGGACATCTGACTCCCCTACCTCTTTATGTCTGCCCAGTGTATTGG				NM_002692.2		14				5427																		RefSeq	ILMN_19705	POLE2	NM_002692.2	S	-	49186840-49186889	DPE2							-1	chrna:
26858	ILMN_2223903	PPIC	Homo sapiens			CCGTCACCCTTTAGTTTGCTTGAACTTTAGTAAACCACCTGCTTAGGGAC				NM_000943.4		5				5480																		RefSeq	ILMN_19075	PPIC	NM_000943.4	S	-	122387265-122387314	MGC3673; CYPC							-1	chrna:
26859	ILMN_1669032	PPIC	Homo sapiens			TGACAGTGGTGCACTCCATAGAGCTCCAAGCAACTGATGGGCATGACCGT				NM_000943.4		5				5480																		RefSeq	ILMN_19075	PPIC	NM_000943.4	S	-	122387549-122387597:122389378-122389378	MGC3673; CYPC							-1	chrna:
3808	ILMN_1802669	PPP3CB	Homo sapiens			TTGGTGGCCTGCTTCCCTCATGCCCTGGAATACAACTCAGAGCTCCAGGC				NM_021132.1		10				5532																		RefSeq	ILMN_13398	PPP3CB	NM_021132.1	S	-	74866705-74866754	CALNA2; CALNB							-1	chrna:
3956	ILMN_2306033	PRAME	Homo sapiens			GACCCACGTGCTGTATCCTGTCCCCCTGGAGAGTTATGAGGACATCCATG				NM_206955.1		22				23532																		RefSeq	ILMN_24135	PRAME	NM_206955.1	A	-	21220661-21220710	MAPE; OIP4							-1	chrna:
18699	ILMN_1803180	PRDX6	Homo sapiens			TGGCTCCCAAGGAGGTGTAGCAGGTGTGAGCAATATTAGTGCCATGTGCC				NM_004905.2		1				9588																		RefSeq	ILMN_1676	PRDX6	NM_004905.2	S	+	171724337-171724386	p29; MGC46173; PRX; AOP2; aiPLA2; 1-Cys; KIAA0106; NSGPx							-1	chrna:
529	ILMN_1662964	PRMT3	Homo sapiens			CCCTCTTTGTGACTATTCCTTAGCCTTATAGATTTCTAGTACTGCCCAGG				NM_005788.1		11				10196																		RefSeq	ILMN_1018	PRMT3	NM_005788.1	S	+	20487134-20487183	HRMT1L3							-1	chrna:
34398	ILMN_3236945	PTPMT1	Homo sapiens			GGCCAGCTGGATGTTCTTAAAGAGTTCCACAAGCAGATTACTGCACGGGC				NM_175732.1		11				114971																		RefSeq	NM_175732.1	PTPMT1	NM_175732.1	S	+	47549671-47549720	PNAS-129; MOSP; FLJ46081; PLIP; DUSP23							-1	chrna:
552	ILMN_1681591	PTPN1	Homo sapiens			ACCCTGCAGAGCTATGGTGAGGTGTGGATAAGGCTTAGGTGCCAGGCTGT				NM_002827.2		20				5770																		RefSeq	ILMN_5417	PTPN1	NM_002827.2	S	+	48634193-48634242	PTP1B							-1	chrna:
40625	ILMN_1753196	PTTG1	Homo sapiens			GGTTGCTAAGGATGGGCTGAAGCTGGGGTCTGGACCTTCAATCAAAGCCT				NM_004219.2		5				9232																		RefSeq	ILMN_11067	PTTG1	NM_004219.2	S	+	159781951-159781988:159782294-159782305	PTTG; MGC126883; HPTTG; SECURIN; MGC138276; EAP1; TUTR1							-1	chrna:
26505	ILMN_1763080	QARS	Homo sapiens			GACCCAGGAAAGGTGTGAGCTGGAAGCACTGAACCTACCTCATCCTCCTG				NM_005051.1		3				5859																		RefSeq	ILMN_11698	QARS	NM_005051.1	S	-	49108433-49108465:49108466-49108482	PRO2195; GLNRS							-1	chrna:
548	ILMN_1672443	QDPR	Homo sapiens			GGTGTCATGTTGGATCGCTTTGTGACTGTTCATCTGTCCTTGACAGTGGC				NM_000320.1		4				5860																		RefSeq	ILMN_26096	QDPR	NM_000320.1	S	-	17097488-17097537	FLJ42391; DHPR; PKU2							-1	chrna:
1935	ILMN_2072541	RAB11FIP2	Homo sapiens			CATGTGGGCCTGTTAGTCTTCGAAGCTTCCAGATGGTTTGTGTTTTGAGG				NM_014904.1		10				22841																		RefSeq	ILMN_20755	RAB11FIP2	NM_014904.1	S	-	119754684-119754733	Rab11-FIP2; KIAA0941; nRip11							-1	chrna:
13413	ILMN_2115434	RAB32	Homo sapiens			CCAGTGTTGCTGATATATGGCTTCTGCTTCTCTTGTGTGTGCCTCAGCTC				NM_006834.2		6				10981																		RefSeq	ILMN_784	RAB32	NM_006834.2	S	+	146917424-146917434:146917435-146917473								-1	chrna:
41985	ILMN_2134974	RAB38	Homo sapiens			CCAAGATGACCTCCATTCTCGGCAGACCTAAGAGTTGCCTCTGAGTTAGC				NM_022337.1		11				23682																		RefSeq	ILMN_22951	RAB38	NM_022337.1	S	-	87486303-87486352	NY-MEL-1; rrGTPbp							-1	chrna:
30567	ILMN_1752582	RAB5B	Homo sapiens			TTCCTACCACCTCTTCTGCCTTCCTTTGAGCTCTGTTGGGCTTGGGGATC				NM_002868.2		12				5869																		RefSeq	ILMN_3818	RAB5B	NM_002868.2	S	+	54674504-54674553								-1	chrna:
28892	ILMN_1733110	RASSF7	Homo sapiens			ACAGCAAGAGCATGTGTGTGCCACTTCCCCTACCCCAACGTGAAAACCTC				NM_003475.2		11				8045																		RefSeq	ILMN_12457	RASSF7	NM_003475.2	S	+	553961-554010	C11orf13; HRC1; MGC126070; MGC126069; HRAS1							-1	chrna:
19463	ILMN_3221865	RCADH5	Homo sapiens			CAACACTGTAGTGGAACATTCTTCTGCATTGGGCTCACTACATTAGTTAC				XM_001717469.1						642443																		RefSeq	XM_001717469.1	RCADH5	XM_001717469.1	A										-1	chrna:
29686	ILMN_1711381	RFC3	Homo sapiens			CTGAATGTCCTGACACCTGCTTCAGAGCTCAAGATTCAGACTCCAGCCTG				NM_181558.2						5983																		RefSeq	ILMN_11846	RFC3	NM_181558.2	I			RFC38; MGC5276							-1	chrna:
6140	ILMN_1741200	RFX5	Homo sapiens			GCTAGTTCTGTGGTCAGGCGGCACCAATGAGAAAGGAATGCAGACCCTCC				NM_001025603.1		1				5993																		RefSeq	ILMN_22971	RFX5	NM_001025603.1	A	-	149580030-149580079								-1	chrna:
13365	ILMN_1671281	RNASEL	Homo sapiens			GCTCCTCACGGGCGATGGCTGTCTTTTCTTGACTTTGTATCTTCACTGCC				NM_021133.2		1				6041																		RefSeq	ILMN_25186	RNASEL	NM_021133.2	S	-	180809983-180810032	DKFZp781D08126; MGC133329; RNS4; PRCA1; MGC104972							-1	chrna:
13364	ILMN_2210601	RNASEL	Homo sapiens			GGTGCTAAGTCTGATGTTCTTTCCATGAATCATTGTGGTGGTTGAGATGG				NM_021133.2		1				6041																		RefSeq	ILMN_25186	RNASEL	NM_021133.2	S	-	180809650-180809699	DKFZp781D08126; MGC133329; RNS4; PRCA1; MGC104972							-1	chrna:
632	ILMN_1729294	RNF130	Homo sapiens			CCTCAGGATGGGGAGCTCACTCCGAGAACAGGAGAAATCAACATTGCAGT				NM_018434.4		5				55819																		RefSeq	ILMN_22886	RNF130	NM_018434.4	S	-	179326416-179326465	G1RZFP; MGC138647; GP; GOLIATH; MGC99542; MGC117241							-1	chrna:
24273	ILMN_1660079	RNF44	Homo sapiens			CCCAGCCCTGGCTGGGCCCAGCGCCTGTGTTCTGTGTTAGAAAGGTTTTA				NM_014901.4		5				22838																		RefSeq	ILMN_20290	RNF44	NM_014901.4	S	-	175886697-175886746	KIAA1100							-1	chrna:
25911	ILMN_1687922	RP9	Homo sapiens			CCACAGTGTGGACTCAGGTCCCATAGACATCAGGCTGGAGTCTTCTCTGT				NM_203288.1		7				6100																		RefSeq	ILMN_23874	RP9	NM_203288.1	S	-	33100971-33101020	PAP-1							-1	chrna:
27668	ILMN_1678669	RRM2	Homo sapiens			GTGTCCTGGGATTCTCTGCCCCCTCTGAGTAGAGTGTTGTGGGATAAAGG				NM_001034.1		2				6241																		RefSeq	ILMN_18637	RRM2	NM_001034.1	S	+	10187637-10187686	RR2M; R2							-1	chrna:
32124	ILMN_1767253	RRP12	Homo sapiens			GAGCCTGGACTCAGGATGACTTGGAACTAGGGCTTGGCTCTCAGAAGTCC				NM_015179.2		10				23223																		RefSeq	ILMN_22207	RRP12	NM_015179.2	S	-	99106694-99106743	FLJ20231; KIAA0690; DKFZp762P1116							-1	chrna:
46155	ILMN_2407168	S100A13	Homo sapiens			AAGACCTGAAGATCAGGAAGAAGTAAAGCCGCCTGGCTGAGATGGGGTGG				NM_001024211.1		1				6284																		RefSeq	ILMN_1543	S100A13	NM_001024211.1	A	-	151857970-151857994:151857995-151858019								-1	chrna:
16368	ILMN_1720889	SC4MOL	Homo sapiens			GCACCAAGAACTTCCATTCTAATCTAGAGCTGACCAGTTTGAGCTGATTC				NM_001017369.1		4				6307																		RefSeq	ILMN_2770	SC4MOL	NM_001017369.1	A	+	166483370-166483419	MGC104344; ERG25; DESP4							-1	chrna:
5057	ILMN_1695475	SEMA3C	Homo sapiens			GTCACAGTTCCCTTTATTTCACATAAGCCCAAACTGATAGACAGTAACGG				NM_006379.2		7				10512																		RefSeq	ILMN_29382	SEMA3C	NM_006379.2	S	-	80210220-80210269	SEMAE; SemE							-1	chrna:
15585	ILMN_1880012	SEMA5A	Homo sapiens			CACCTAACCAATCAATGGAAGGCAACTCACACCTGCTCCAAGCCTCAGCT				NM_003966.2						9037																		RefSeq	ILMN_72110	SEMA5A	NM_003966.2	S			semF; FLJ12815; SEMAF							-1	chrna:
22199	ILMN_1712914	SEMA6B	Homo sapiens			TTGCCTCCCCCAGCCCCCTCCCCATCAATAAAACTCTGTTTACAACCACC				NM_032108.2		19				10501																		RefSeq	ILMN_16679	SEMA6B	NM_032108.2	A	-		SEMA-VIB; Sema VIb; SEMAN; semaZ; SEM-SEMA-Y							-1	chrna:
26990	ILMN_1788874	SERPINA3	Homo sapiens			TGGCATGTGTGGCCCTGTCTGCTTATCCTTGGAAGGTGACAGCGATTCCC				NM_001085.4		14				12																		RefSeq	ILMN_16107	SERPINA3	NM_001085.4	S	+	94160006-94160055	GIG24; GIG25; AACT; MGC88254; ACT							-1	chrna:
21597	ILMN_2397028	SERPINB8	Homo sapiens			AGGAGCTGAGCATGGTCATTCTGCTTCCCGATGACAACACGGACCTCGCC				NM_002640.3		18				5271																		RefSeq	ILMN_11827	SERPINB8	NM_002640.3	A	+	59803407-59803456	CAP2; PI8							-1	chrna:
20672	ILMN_1730794	SERTAD4	Homo sapiens			CACCTGTCTAGGGGCGGCAATCAACAGTCTTACACAGAGAGGGTATTCCC				NM_019605.2		1				56256																		RefSeq	ILMN_9918	SERTAD4	NM_019605.2	S	+	208482861-208482910	DJ667H12.2							-1	chrna:
2204	ILMN_1724495	SESTD1	Homo sapiens			GCGCTGCACTTCTCGGTCATCTGGGGATACACTTCCTCGACTGAACAGAG				NM_178123.3		2				91404																		RefSeq	ILMN_17887	SESTD1	NM_178123.3	S	-	179688100-179688149	DKFZp434O0515; SOLO							-1	chrna:
2530	ILMN_1702861	SGCD	Homo sapiens			GTCCCCAACCCGGTCTCTAGTGATGGAGGCCCCAAAAGGAGTGGAAATCA				NM_172244.2		5				6444																		RefSeq	ILMN_9959	SGCD	NM_172244.2	A	+	156117176-156117225	SG-delta; SGCDP; CMD1L; MGC22567; 35DAG; SGD; DAGD							-1	chrna:
27947	ILMN_1763457	SGCD	Homo sapiens			CCTAGAAAATGGCAGAGCTGGAATGTAGGTTTAACTCCTGACCACTATGC				NM_000337.4		5				6444																		RefSeq	ILMN_9850	SGCD	NM_000337.4	I	+	156125319-156125368	SG-delta; SGCDP; CMD1L; MGC22567; 35DAG; SGD; DAGD							-1	chrna:
25317	ILMN_3229324	SGK1	Homo sapiens			CGGACGCTGTTCTAAAAAAGGTCTCCTGCAGATCTGTCTGGGCTGTGATG				NM_005627.3		6				6446																		RefSeq	NM_005627.3	SGK1	NM_005627.3	A	-	134491069-134491118	SGK							-1	chrna:
10640	ILMN_1732923	SIPA1L2	Homo sapiens			TCAGACCGAGAAGCAGGGTGAGAGATTCTAACGACTGGATGCTGCTAGTA				NM_020808.3						57568																		RefSeq	ILMN_11345	SIPA1L2	NM_020808.3	S			SPAL2; FLJ23126; KIAA1389; FLJ23632							-1	chrna:
16907	ILMN_1758146	SIRPA	Homo sapiens			GAACCCCAGGAAAAGGAAGAGGTCGAACCAACCCTGCGGAAGGAGCATGG				NM_001040023.1		20				140885																		RefSeq	ILMN_1639	SIRPA	NM_001040023.1	S	+	1868371-1868420	SIRPalpha2; BIT; SHPS1; MFR; SIRP; SHPS-1; CD172A; SIRP-ALPHA-1; SIRPalpha; PTPNS1; P84; MYD-1							-1	chrna:
6311	ILMN_3249807	SKA2	Homo sapiens			CTCAAGCCTCTTTGTGGATGACTCCTAAATATAACTTCTTCCACTAGCTC				NM_182620.3		17				348235																		RefSeq	NM_182620.3	SKA2	NM_182620.3	A	-	57187488-57187537	MGC110975; Ska2; FLJ12758							-1	chrna:
41304	ILMN_2364022	SLC16A3	Homo sapiens			CACCCCTGGAAGATGGAAATAAACCTGCGTGTGGGTGGAGTGTTAGGACC				NM_004207.2						9123																		RefSeq	ILMN_16135	SLC16A3	NM_004207.2	A			MCT3; MGC138472; MGC138474; MCT4							-1	chrna:
27614	ILMN_2211780	SLC25A4	Homo sapiens			GTGCCTGGTCCAATGTGCTGAGAGGCATGGGCGGTGCTTTTGTATTGGTG				NM_001151.2		4				291																		RefSeq	ILMN_2485	SLC25A4	NM_001151.2	S	+	186305040-186305089	PEO2; ANT1; PEO3; T1; ANT							-1	chrna:
39839	ILMN_1749848	SLC35F1	Homo sapiens			CTGGGGACAGCGCTTGCCTTGGTCAGACCTTCCCACATCTACATACTCTC				NM_001029858.2						222553																		RefSeq	ILMN_2907	SLC35F1	NM_001029858.2	S			dJ230I3.1; C6orf169; FLJ13018							-1	chrna:
27204	ILMN_2124471	SLC36A1	Homo sapiens			GGCCAGAGGACATAAATGGTGCTGGTAGGAGGTTATCAGAGTAAGGAAGG				NM_078483.2		5				206358																		RefSeq	ILMN_22384	SLC36A1	NM_078483.2	S	+	150851747-150851796	TRAMD3; PAT1; LYAAT1							-1	chrna:
20235	ILMN_2082585	SNAI2	Homo sapiens			AGGATTTCCCATAGGAAGAGATCTGCCAGACGCGAACTCAGGTGCCTTAA				NM_003068.3		8				6591																		RefSeq	ILMN_165913	SNAI2	NM_003068.3	S	-	49993471-49993520	WS2D; SLUG; SLUGH1; MGC10182							-1	chrna:
32981	ILMN_1680251	SORCS1	Homo sapiens			GCAACTTTGAGAGCAGTGGGGTGCTTGGCAGCTGTTCTGTGTTTTCCAGG				NM_001013031.1		10				114815																		RefSeq	ILMN_3669	SORCS1	NM_001013031.1	A	-	108323867-108323916	FLJ41758; FLJ43475; FLJ44957							-1	chrna:
6156	ILMN_1787266	SPINK1	Homo sapiens			GCCTTGGCCCTGTTGAGTCTATCTGGTAACACTGGAGCTGACTCCCTGGG				NM_003122.2		5				6690																		RefSeq	ILMN_25404	SPINK1	NM_003122.2	S	-	147189361-147189386:147191279-147191302	Spink3; PCTT; PSTI; TATI							-1	chrna:
22532	ILMN_1757845	SPIRE1	Homo sapiens			CTAGGCTTCCTGCGTGTGTAAAAGTCGAGGTATTGCTGGCATTCAGGGTG				NM_020148.2		18				56907																		RefSeq	ILMN_2975	SPIRE1	NM_020148.2	S	-	12436588-12436637	Spir-1; MGC150622; MGC150621							-1	chrna:
20581	ILMN_1784948	SPOCD1	Homo sapiens			TGAAGCCTGTTCCAGAGAGAGGTGGGACTGCAAGGAGAGGATGGTCAGCC				NM_144569.4						90853																		RefSeq	ILMN_6339	SPOCD1	NM_144569.4	S			FLJ39908; FLJ25348; RP11-84A19.1							-1	chrna:
44477	ILMN_1674367	SPRR2F	Homo sapiens			GGTTTTCTTTTTGAGGCTGCCATACTGCCACTGTCGAGGTGGAGACTGAG				NM_001014450.1		1				6705																		RefSeq	ILMN_28582	SPRR2F	NM_001014450.1	S	-	151351404-151351453								-1	chrna:
6333	ILMN_2041293	SQLE	Homo sapiens			GTCAGAACCTTGGATTACAAAACCTCGAGCCCTTCTCAGTAGTGGTGCTG				NM_003129.3		8				6713																		RefSeq	ILMN_183123	SQLE	NM_003129.3	S	+	126103251-126103300								-1	chrna:
20349	ILMN_1684697	SSX2	Homo sapiens			GAGTACGCACGGTCTGATTTTCTCTTTGGATTCTTCCAAAATCAGAGTCA				NM_003147.4		X				6757																		RefSeq	ILMN_137941	SSX2	NM_003147.4	A	-	52751540-52751544:52752887-52752931	HD21; MGC119055; SSX; HOM-MEL-40; MGC3884; MGC15364							-1	chrna:
20348	ILMN_1676207	SSX2	Homo sapiens			CTTTCGATTCTTCCATACTCAGAGTACGCACGGTCTGATTTTCTCTTTGG				NM_003147.4		X				6757																		RefSeq	ILMN_1156	SSX2	NM_003147.4	A	-	52752903-52752952	HD21; MGC119055; SSX; HOM-MEL-40; MGC3884; MGC15364							-1	chrna:
11085	ILMN_2402303	SSX4B	Homo sapiens			CACATGCCCATGATGAGAAGCAGAACGTGGTGACCTTTCACGAACATGGG				NM_001034832.2		X				548313																		RefSeq	ILMN_9301	SSX4B	NM_001034832.2	A	-	48146991-48147040								-1	chrna:
24089	ILMN_1732696	SSX6	Homo sapiens			GTGGGAATGAGGTTGAACGTCCTCAGATGACTTTTGGCAGGCTCCAGAGA				NM_173357.2		X				280657																		RefSeq	ILMN_29370	SSX6	NM_173357.2	S	+	47855672-47855683:47857520-47857557	dJ54B20.1							-1	chrna:
14	ILMN_1682799	STAMBPL1	Homo sapiens			TGTAAGCACCGTCAACATCAGACACCTACTCATGGACATGTGGTTGCCGG				NM_020799.2		10				57559																		RefSeq	ILMN_1387	STAMBPL1	NM_020799.2	S	+	90672973-90673022	KIAA1373; bA399O19.2; FLJ31524; AMSH-LP; AMSH-FP; ALMalpha							-1	chrna:
19471	ILMN_1738449	STIM2	Homo sapiens			GAGTGGAGGAGGCTGGCCAAAGAGACTGTGGGCTGTTTTCAGTCAGGGAG				NM_020860.1		4				57620																		RefSeq	ILMN_15073	STIM2	NM_020860.1	S	+	26635758-26635807	KIAA1482; FLJ39527							-1	chrna:
23594	ILMN_1756612	STK32A	Homo sapiens			GGTCATGGCCCTGGACTACCTGCAGAACCAGCGCATCATTCACAGGGATA				NM_145001.2						202374																		RefSeq	ILMN_10780	STK32A	NM_145001.2	S			MGC22688; YANK1							-1	chrna:
30094	ILMN_1792518	STX7	Homo sapiens			AGCTGTCAAGGGCAGCAGATTATCAGCGCAAATCCAGAAAAACCCTGTGC				NM_003569.1		6				8417																		RefSeq	ILMN_23974	STX7	NM_003569.1	S	-	132823658-132823682:132826825-132826849								-1	chrna:
29442	ILMN_3239378	TADA2B	Homo sapiens			TATTCCCGTCACGGTAGTCCTTACCTCTGTCGGCAGCTCAGAGCCTCCAC				NM_152293.2		4				93624																		RefSeq	NM_152293.2	TADA2B	NM_152293.2	S	+	7059114-7059163	ADA2B; ADA2(beta)							-1	chrna:
28332	ILMN_2090105	TAGLN2	Homo sapiens			TGTGTCCTCCGTTCATTCCATGGCTGGGAGTCACTGATGCTGCCTCTGCC				NM_003564.1		1				8407																		RefSeq	ILMN_14546	TAGLN2	NM_003564.1	S	-	158154828-158154877	KIAA0120; HA1756							-1	chrna:
22967	ILMN_1698139	TCEA1	Homo sapiens			AAGAAAGAACCTGCAATTACATCGCAGAACAGCCCTGAGGCAAGAGAAGA				NM_006756.2		8				6917																		RefSeq	ILMN_9423	TCEA1	NM_006756.2	A	-	55068783-55068832	SII; GTF2S; TF2S; TCEA; TFIIS							-1	chrna:
29876	ILMN_1734190	TCEAL3	Homo sapiens			GCTTTAGATGTCAGTCTCGTTACCAGCAGCCTTTTGACCCAACTACGGCG				NM_001006933.1		X				85012																		RefSeq	ILMN_20249	TCEAL3	NM_001006933.1	A	+	102751358-102751407	MGC15737							-1	chrna:
38497	ILMN_1705241	TDRD7	Homo sapiens			TAACTCTGCTACATGGCTCTGACTGCTGTGGGGGATTGAAAAGAATATGC				NM_014290.1		9				23424																		RefSeq	ILMN_27692	TDRD7	NM_014290.1	S	+	99298064-99298113	RP11-508D10.1; PCTAIRE2BP; KIAA1529							-1	chrna:
31760	ILMN_2298936	THOC3	Homo sapiens			GTTACGGCGTCTGGAGATAAAACCATTCGCATCTGGGATGTGAGGACTAC				NM_032361.1		5				84321																		RefSeq	ILMN_17969	THOC3	NM_032361.1	I	-	175326748-175326797	TEX1; MGC5469							-1	chrna:
4480	ILMN_1762003	TLOC1	Homo sapiens			TCCGTGAATCCCTTAGAGGTCTGTGAATTGTAGGTTAAGAACCCCTGCCC				NM_003262.3		3				7095																		RefSeq	ILMN_7040	TLOC1	NM_003262.3	S	+	171198613-171198662	HTP1; SEC62; FLJ32803; Dtrp1							-1	chrna:
6882	ILMN_1730645	TMEFF2	Homo sapiens			CTAAAGGGAGCATGTTTCACAGTGGCTGGACTACCGAGAGCTTGGACTAC				NM_016192.2		2				23671																		RefSeq	ILMN_17013	TMEFF2	NM_016192.2	S	-	192523235-192523281:192523282-192523284	TPEF; TENB2; TR; HPP1							-1	chrna:
20342	ILMN_1654516	TMEM120A	Homo sapiens			CCACAAGTTTCACAGTCAGCGGCACGGGAGCAAGAAGGATTGAGGCTGGG				NM_031925.1		7				83862																		RefSeq	ILMN_9004	TMEM120A	NM_031925.1	S	-	75454418-75454425:75454426-75454467	TMPIT							-1	chrna:
30717	ILMN_3251207	TMEM19	Homo sapiens			TCATGTGTCAGTTTTCACACAGCCTGCACATCGTTCTGACATGCCCTTTT				NM_018279.3		12				55266																		RefSeq	NM_018279.3	TMEM19	NM_018279.3	S	+	70383455-70383504	FLJ10936							-1	chrna:
30718	ILMN_1693333	TMEM19	Homo sapiens			GGGTTGCAACAATTGGGTTAAACTTTGGGTATACATTGGAAGCACCAGGG				NM_018279.3		12				55266																		RefSeq	ILMN_139381	TMEM19	NM_018279.3	S	+	70382302-70382351	FLJ10936							-1	chrna:
3147	ILMN_1784661	TMEM2	Homo sapiens			GGCTGATGGCCTCTACCTTTGTATCCAGGAGAAACTGCAGAGCAGCCCTG				NM_013390.1		9				23670																		RefSeq	ILMN_11103	TMEM2	NM_013390.1	S	-	73488479-73488528								-1	chrna:
45594	ILMN_2129234	TMEM47	Homo sapiens			GTCATCTGGGGGAAAACCTGTTTATCACTCCAGTGATTTTGAGTTTGCAG				NM_031442.2		X				83604																		RefSeq	ILMN_2011	TMEM47	NM_031442.2	S	-	34555202-34555251	DKFZp564E153; BCMP1; DKFZP761J17121; MGC32949; TM4SF10							-1	chrna:
22114	ILMN_2150402	TMEM64	Homo sapiens			GACCAGTGCAAATACTTTGAGAGCACCTGGGTCTACAGGACATAATTGGC				NM_001008495.2		8				169200																		RefSeq	ILMN_3155	TMEM64	NM_001008495.2	S	-		DKFZp762C1112							-1	chrna:
18583	ILMN_1768816	TMPO	Homo sapiens			CCATGGGAAATGCCACTGTAGGTCGTCGATACCTCTGGCTGAAGGATTGC				NM_003276.1		12				7112																		RefSeq	ILMN_12700	TMPO	NM_003276.1	I	+	97452091-97452140	MGC61508; PRO0868; CMD1T; TP; LAP2							-1	chrna:
7865	ILMN_1704154	TNFRSF19	Homo sapiens			GGTAATGCGTGTGGCTGAATGGGCATAACCACTGTGGCTTCTTGTGCTGC				NM_148957.2		13				55504																		RefSeq	ILMN_28684	TNFRSF19	NM_148957.2	I	+	23147852-23147901	TAJ; TAJ-alpha; TRADE; TROY							-1	chrna:
26217	ILMN_1679796	TOMM20	Homo sapiens			GTAATCAGCTTGTTGTAGTGATGCTGGCCAAATGGTGCTCAGCAGGTGAG				NM_014765.1		1				9804																		RefSeq	ILMN_20433	TOMM20	NM_014765.1	S	-	233339819-233339868	TOM20; MOM19; KIAA0016; MGC117367; MAS20							-1	chrna:
6025	ILMN_3251472	TOMM20	Homo sapiens			GTAGAGCTTGCATAGTCGGCACTCAGTAAATGTTTGGTTCCTTTTGCCCC				NM_014765.2		1				9804																		RefSeq	NM_014765.2	TOMM20	NM_014765.2	S	-	235272872-235272921								-1	chrna:
36201	ILMN_2350122	TRIM13	Homo sapiens			AAAAAAGGATCAGCTGGCTGGGCAGGGTGGCTCATGTCTATAATCTCAGC				NM_001007278.1		13				10206																		RefSeq	ILMN_14225	TRIM13	NM_001007278.1	A	+	49486310-49486359	RNF77; CAR; LEU5; RFP2; DLEU5							-1	chrna:
4	ILMN_1796063	TRIM44	Homo sapiens			CCTGCCTGTCTGCCTGTGACCTGTGTACGTATTACAGGCTTTAGGACCAG				NM_017583.3		11				54765																		RefSeq	ILMN_5006	TRIM44	NM_017583.3	S	+	35786070-35786119	MGC3490; MC7; HSA249128; DIPB							-1	chrna:
5436	ILMN_1735788	TRIOBP	Homo sapiens			TTCCTGCCCTACCTCCTACTAACACTTCCTGCCCCATTTGGACCCGTACC				NM_001039141.1		22				11078																		RefSeq	ILMN_138473	TRIOBP	NM_001039141.1	I	+	36500261-36500310	TARA; FLJ39315; KIAA1662; dJ37E16.4; HRIHFB2122; DFNB28							-1	chrna:
29691	ILMN_1796589	TRIP13	Homo sapiens			CGGTATGGGCGCCCCTGCATTGCTGGGATGTTTCTGCCCACGGTTTTGTT				NM_004237.2		5				9319																		RefSeq	ILMN_15061	TRIP13	NM_004237.2	S	+	970891-970940	16E1BP							-1	chrna:
14655	ILMN_1775677	TYSND1	Homo sapiens			AGGGGCGCTCTTGACACTGTGCCTTCATTTTCCAGCCCACAGCCTGGGTC				NM_001040273.1		10				219743																		RefSeq	ILMN_16157	TYSND1	NM_001040273.1	S	-	71569035-71569084	FLJ40378; MGC34695; MGC131934							-1	chrna:
40506	ILMN_1771601	UFSP1	Homo sapiens			TGGGTGGGCTGGCAAGAGGTGAGTGCAGCCTTTGACCCCAACTCCTTCTA				NM_001015072.3						402682																		RefSeq	ILMN_27699	UFSP1	NM_001015072.3	S										-1	chrna:
23927	ILMN_1810233	UGT2B11	Homo sapiens			CAGAGCTCTGGAGAAAATGGTGTTGTGGTGTTTTCTCTGGGGTCAGTGAT				NM_001073.1		4				10720																		RefSeq	ILMN_5225	UGT2B11	NM_001073.1	S	-	70108721-70108770	MGC129612; MGC129611							-1	chrna:
23928	ILMN_2162819	UGT2B11	Homo sapiens			GCCCCACAAAGGAGCCAAACACCTTCGAGTTGCAGCCCATGACCTCACCT				NM_001073.1		4				10720																		RefSeq	ILMN_5225	UGT2B11	NM_001073.1	S	-	70100883-70100932	MGC129612; MGC129611							-1	chrna:
23	ILMN_1755897	UGT2B7	Homo sapiens			GAGCTAAACACCTTCGGGTTGCAGCCCACGACCTCACCTGGTTCCAGTAC				XM_001128725.1						7364																		RefSeq	ILMN_22479	UGT2B7	XM_001128725.1	A										-1	chrna:
32875	ILMN_1786065	UHRF1	Homo sapiens			CCAGTTCTTCCTGACACCGGATGGGTGCTTGGGAACCGTTTGAGCCTTAT				NM_001048201.1						29128																		RefSeq	ILMN_12005	UHRF1	NM_001048201.1	S			Np95; hNP95; MGC138707; ICBP90; RNF106; FLJ21925							-1	chrna:
1519	ILMN_1809467	VAMP5	Homo sapiens			CATCCTGATTGTGCTGCTGGTCGTCTTTCTCCCTCAGAGCAGTGACAGCA				NM_006634.2		2				10791																		RefSeq	ILMN_20179	VAMP5	NM_006634.2	S	+	85673689-85673738	MYOBREVIN							-1	chrna:
37722	ILMN_1796216	VASH1	Homo sapiens			TGATGGACCTCCCCGCTCCCTCAAGCTCTGGATGGCTGCAGTGTTGTACT				NM_014909.3						22846																		RefSeq	ILMN_4905	VASH1	NM_014909.3	S			KIAA1036							-1	chrna:
40240	ILMN_1768480	VGLL4	Homo sapiens			GCGCTGCCTGCAGTGCGCTCTGACCTTCTCTTCATGTGTGTAAATCTGTA				NM_014667.1		3				9686																		RefSeq	ILMN_29344	VGLL4	NM_014667.1	S	-	11572662-11572711	VGL-4; KIAA0121							-1	chrna:
26326	ILMN_1658289	WDR54	Homo sapiens			GTGATTCCTCAGGCAACTCCTTTGCTGTGACTGGCTATGACCTTGCGGAG				NM_032118.2		2				84058																		RefSeq	ILMN_24792	WDR54	NM_032118.2	S	+	74506263-74506312	FLJ12953							-1	chrna:
4910	ILMN_2321292	WIPI2	Homo sapiens			GGAACCTGGAGTCAAAAAGAACTGCTTCAGTCCCCGCTGTACCGCCTGCC				NM_016003.3		7				26100																		RefSeq	ILMN_28022	WIPI2	NM_016003.3	A	+	5239758-5239807	FLJ12979; FLJ14217; DKFZP434J154; DKFZp686P02188; Atg21; WIPI-2; CGI-50; FLJ42984							-1	chrna:
17494	ILMN_2415748	WSB1	Homo sapiens			CTTACGAAAGTTGAATTGGGTGAGGCGGGCAAATCACCTGAGGTCAGCAG				NM_134265.2		17				26118																		RefSeq	ILMN_5396	WSB1	NM_134265.2	A	+	22663930-22663979	SWIP1; WSB-1							-1	chrna:
17493	ILMN_1664802	WSB1	Homo sapiens			CTGTTTCTGCAGGGGATGATATTGGTGAGTTGCCAAAGAAGCAATACAGC				NM_134265.2		17				26118																		RefSeq	ILMN_674	WSB1	NM_134265.2	A	+	22664611-22664660	SWIP1; WSB-1							-1	chrna:
37291	ILMN_1711069	YPEL5	Homo sapiens			GTGACTTCTGAGTACAGTTAAGTTCCTCCTATTTGCCACTGGGCTGTTGG				NM_016061.1		2				51646																		RefSeq	ILMN_8828	YPEL5	NM_016061.1	S	+	30236635-30236684	CGI-127							-1	chrna:
1627	ILMN_1689456	ZBTB20	Homo sapiens			GCTCCGTCTGCCCAGCAAAGTTTGACCAAATCGAGCAGTTCAACGACCAC				NM_015642.3						26137																		RefSeq	ILMN_27339	ZBTB20	NM_015642.3	S			DKFZp566F123; ODA-8S; HOF; ZNF288; DPZF							-1	chrna:
23131	ILMN_1799890	ZFYVE20	Homo sapiens			CCTCTGAGTCATTGTGAGCTGTGTGGTAGGTTGGACATTGGCATAGTTGG				NM_022340.2		3				64145																		RefSeq	ILMN_15619	ZFYVE20	NM_022340.2	S	-	15086751-15086800	MGC126210; Rabenosyn-5; FLJ34993							-1	chrna:
24534	ILMN_2243553	ZNF275	Homo sapiens			GCCTCTGGTAACTTGGGGGTGGATTTCCTTGGGCTCTCTAGGTGTACTGC				NM_001080485.1						10838																		RefSeq	ILMN_180340	ZNF275	NM_001080485.1	I										-1	chrna:
12504	ILMN_1681628	ZNF277P	Homo sapiens			CTAAACACACTTCGCTGCTCCCCGATAGAAAGACGTGGGATCAACTGGAG				NM_021994.2						11179																		RefSeq	ILMN_2173	ZNF277P	NM_021994.2	S			ZNF277; NRIF4							-1	chrna:
13011	ILMN_2374633	ZWILCH	Homo sapiens			AGGCACTGGACATCCTCACGTGGAGTTCACAGGCTCATCAGTGAATTCTG				NR_003105.1						55055																		RefSeq	ILMN_166966	ZWILCH	NR_003105.1	A			FLJ10036; FLJ16343; KNTC1AP; MGC111034; hZwilch							-1	chrna:
28901	ILMN_1865764		Homo sapiens	Hs.371609		TGCTGTTGGGTCGGAGTGCCAGTCACTGCTTTGGAAGTCTGTGTTCTGGG				BC036485																								Unigene	ILMN_88177	HS.371609	Hs.371609	S										-1	chrna:
[truncated: 30 more columns]
