# Supplementary material for: Loss of CITED1, an MITF regulator, drives a phenotype switch in vitro and can predict clinical outcome in primary melanoma tumours
Source: PeerJ journal article supplement (doi:10.7717/peerj.788), 2015-02-26
Supplement: S2.pdf [file S2.pdf]

**a**

genes altered by siCITED1  
(312 probes)

MITF occupied  
(unique genes = 5169)

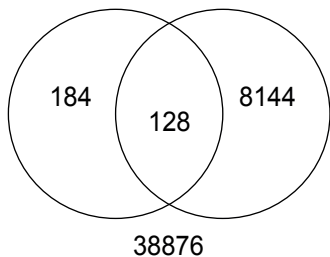

Chi-sq (yates) p-value < 0.0001

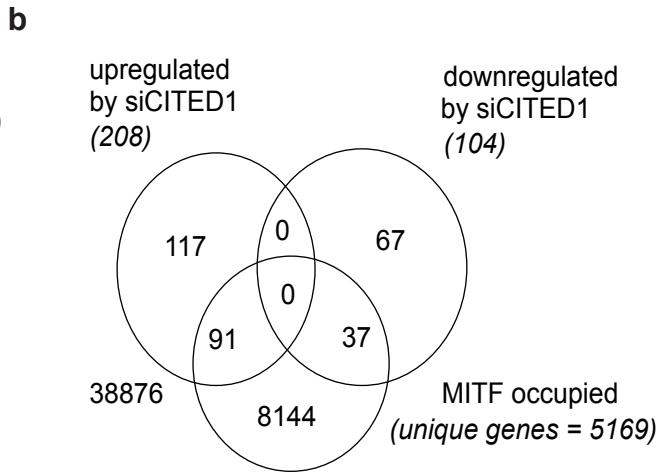

### Illumina probes

|                           | MITF occupied | Not occupied | Total |
|---------------------------|---------------|--------------|-------|
| sig changed with siCITED1 | 128           | 184          | 312   |
| not signif                | 8144          | 38876        | 47020 |
| Total                     | 8272          | 39060        | 47332 |
